# Supplementary material for: Speciation and Antibiotic Susceptibilities of Coagulase Negative Staphylococci Isolated from Ocular Infections
Source: MDPI journal article supplement (doi:10.3390/antibiotics10060721), 2021-06-16
Supplement: s1 [file s1]

**Table S1. (Kowalski) Supplemental Data of 150 CoNS Isolates  
and Speciationby API Staph, Biolog, and DNA Sequencing**

[E – Endophthalmitis; K – Keratitis; B – Blepharitis/Conjunctivitis]

|       | STAPH ID KIT          |  | BIOLOG ID             |  | DNA Sequencing        |
|-------|-----------------------|--|-----------------------|--|-----------------------|
| Lab # | Species               |  | Species               |  | Species               |
| E753  | <i>S. epidermidis</i> |  | <i>S. epidermidis</i> |  | <i>S. epidermidis</i> |
| E757  | <i>S. epidermidis</i> |  | <i>S. epidermidis</i> |  | <i>S. epidermidis</i> |
| E759  | <i>S. epidermidis</i> |  | <i>S. epidermidis</i> |  | <i>S. epidermidis</i> |
| E761  | <i>S. lugdunensis</i> |  | <i>S. epidermidis</i> |  | <i>S. epidermidis</i> |
| E762  | <i>S. epidermidis</i> |  | <i>S. epidermidis</i> |  | <i>S. epidermidis</i> |
| E767  | <i>S. epidermidis</i> |  | <i>S. epidermidis</i> |  | <i>S. epidermidis</i> |
| E769  | <i>S. epidermidis</i> |  | <i>S. epidermidis</i> |  | <i>S. epidermidis</i> |
| E771  | <i>S. epidermidis</i> |  | <i>S. epidermidis</i> |  | <i>S. epidermidis</i> |
| E782  | <i>S. epidermidis</i> |  | <i>S. epidermidis</i> |  | <i>S. epidermidis</i> |
| E784  | <i>S. epidermidis</i> |  | <i>S. epidermidis</i> |  | <i>S. epidermidis</i> |
| E785  | <i>S. aureus</i>      |  | <i>S. epidermidis</i> |  | <i>S. epidermidis</i> |
| E786  | <i>S. epidermidis</i> |  | <i>S. epidermidis</i> |  | <i>S. epidermidis</i> |
| E787  | <i>S. epidermidis</i> |  | <i>S. epidermidis</i> |  | <i>S. epidermidis</i> |
| E790  | <i>S. epidermidis</i> |  | <i>S. epidermidis</i> |  | <i>S. epidermidis</i> |
| E791  | <i>S. lugdunensis</i> |  | <i>S. lugdunensis</i> |  | <i>S. epidermidis</i> |
| E792  | <i>S. epidermidis</i> |  | <i>S. epidermidis</i> |  | <i>S. epidermidis</i> |
| E794  | <i>S. epidermidis</i> |  | <i>S. epidermidis</i> |  | <i>S. epidermidis</i> |
| E796  | <i>S. epidermidis</i> |  | <i>S. epidermidis</i> |  | <i>S. epidermidis</i> |
| E797  | <i>S. epidermidis</i> |  | <i>S. epidermidis</i> |  | <i>S. epidermidis</i> |
| E798  | <i>S. epidermidis</i> |  | <i>S. epidermidis</i> |  | <i>S. epidermidis</i> |
| E801  | <i>S. epidermidis</i> |  | <i>S. epidermidis</i> |  | <i>S. epidermidis</i> |
| E803  | <i>S. epidermidis</i> |  | <i>S. epidermidis</i> |  | <i>S. epidermidis</i> |
| E804  | <i>S. hominis</i>     |  | <i>S. hominis</i>     |  | <i>S. hominis</i>     |
| E807  | <i>S. hominis</i>     |  | <i>S. lugdunensis</i> |  | <i>S. lugdunensis</i> |
| E810  | <i>S. epidermidis</i> |  | <i>S. epidermidis</i> |  | <i>S. epidermidis</i> |
| E811  | <i>S. epidermidis</i> |  | <i>S. epidermidis</i> |  | <i>S. epidermidis</i> |
| E814  | <i>S. epidermidis</i> |  | <i>S. lugdunensis</i> |  | <i>S. lugdunensis</i> |
| E816  | <i>S. epidermidis</i> |  | <i>S. epidermidis</i> |  | <i>S. epidermidis</i> |
| E817  | <i>S. hominis</i>     |  | <i>S. lugdunensis</i> |  | <i>S. lugdunensis</i> |
| E820  | <i>S. epidermidis</i> |  | <i>S. epidermidis</i> |  | <i>S. epidermidis</i> |
| E822  | <i>S. epidermidis</i> |  | <i>S. epidermidis</i> |  | <i>S. epidermidis</i> |
| E823  | <i>S. epidermidis</i> |  | <i>S. epidermidis</i> |  | <i>S. epidermidis</i> |
| E825  | <i>S. epidermidis</i> |  | <i>S. epidermidis</i> |  | <i>S. epidermidis</i> |
| E826  | <i>S. epidermidis</i> |  | <i>S. epidermidis</i> |  | <i>S. epidermidis</i> |
| E827  | <i>S. epidermidis</i> |  | <i>S. epidermidis</i> |  | <i>S. epidermidis</i> |
| E831  | <i>S. epidermidis</i> |  | <i>S. epidermidis</i> |  | <i>S. epidermidis</i> |
| E836  | <i>S. epidermidis</i> |  | <i>S. epidermidis</i> |  | <i>S. epidermidis</i> |
| E839  | <i>S. epidermidis</i> |  | <i>S. epidermidis</i> |  | <i>S. epidermidis</i> |
| E840  | <i>S. epidermidis</i> |  | <i>S. epidermidis</i> |  | <i>S. epidermidis</i> |
| E844  | <i>S. epidermidis</i> |  | <i>S. epidermidis</i> |  | <i>S. epidermidis</i> |

|      |                       |  |                       |  |                       |
|------|-----------------------|--|-----------------------|--|-----------------------|
| E847 | <i>S. epidermidis</i> |  | <i>S. epidermidis</i> |  | <i>S. epidermidis</i> |
| E848 | <i>S. epidermidis</i> |  | <i>S. epidermidis</i> |  | <i>S. epidermidis</i> |

|       |                        |  |                                      |  |                        |
|-------|------------------------|--|--------------------------------------|--|------------------------|
| E852  | <i>S. epidermidis</i>  |  | <i>S. epidermidis</i>                |  | <i>S. epidermidis</i>  |
| E853  | <i>S. epidermidis</i>  |  | <i>S. epidermidis</i>                |  | <i>S. epidermidis</i>  |
| E855  | <i>S. epidermidis</i>  |  | <i>S. epidermidis</i>                |  | <i>S. epidermidis</i>  |
| E863  | <i>S. haemolyticus</i> |  | <i>S. haemolyticus</i>               |  | <i>S. haemolyticus</i> |
| E872  | <i>S. capitis</i>      |  | <i>S. epidermidis</i>                |  | <i>S. epidermidis</i>  |
| E874  | <i>S. epidermidis</i>  |  | <i>S. epidermidis</i>                |  | <i>S. epidermidis</i>  |
| E877  | <i>S. epidermidis</i>  |  | <i>S. epidermidis</i>                |  | <i>S. epidermidis</i>  |
| E878  | <i>S. epidermidis</i>  |  | <i>S. epidermidis</i>                |  | <i>S. epidermidis</i>  |
|       |                        |  |                                      |  |                        |
| K2549 | <i>S. epidermidis</i>  |  | <i>S. epidermidis</i>                |  | <i>S. epidermidis</i>  |
| K2551 | <i>S. epidermidis</i>  |  | <i>S. epidermidis</i>                |  | <i>S. epidermidis</i>  |
| K2590 | <i>S. epidermidis</i>  |  | <i>S. epidermidis</i>                |  | <i>S. epidermidis</i>  |
| K2624 | <i>S. epidermidis</i>  |  | <i>S. epidermidis</i>                |  | <i>S. epidermidis</i>  |
| K2663 | <i>S. epidermidis</i>  |  | <i>S. epidermidis</i>                |  | <i>S. epidermidis</i>  |
| K2671 | <i>S. epidermidis</i>  |  | <i>S. epidermidis</i>                |  | <i>S. epidermidis</i>  |
| K2699 | <i>S. epidermidis</i>  |  | <i>S. epidermidis</i>                |  | <i>S. epidermidis</i>  |
| K2705 | <i>S. epidermidis</i>  |  | <i>S. epidermidis</i>                |  | <i>S. epidermidis</i>  |
| K2708 | <i>S. epidermidis</i>  |  | <i>S. epidermidis</i>                |  | <i>S. epidermidis</i>  |
| K2714 | <i>S. epidermidis</i>  |  | <i>S. epidermidis</i>                |  | <i>S. epidermidis</i>  |
| K2715 | <i>S. epidermidis</i>  |  | <i>S. epidermidis</i>                |  | <i>S. epidermidis</i>  |
| K2724 | <i>S. epidermidis</i>  |  | <i>S. epidermidis</i>                |  | <i>S. epidermidis</i>  |
| K2725 | <i>S. epidermidis</i>  |  | <i>S. epidermidis</i>                |  | <i>S. epidermidis</i>  |
| K2737 | <i>S. caprae</i>       |  | <i>S. pasteurii</i>                  |  | <i>S. caprae</i>       |
| K2743 | <i>S. epidermidis</i>  |  | <i>S. epidermidis</i>                |  | <i>S. epidermidis</i>  |
| K2748 | <i>S. epidermidis</i>  |  | <i>S. epidermidis</i>                |  | <i>S. epidermidis</i>  |
| K2755 | <i>S. epidermidis</i>  |  | <i>S. epidermidis</i>                |  | <i>S. epidermidis</i>  |
| K2761 | <i>S. aureus</i>       |  | <i>S. epidermidis</i>                |  | <i>S. epidermidis</i>  |
| K2770 | <i>S. hominis</i>      |  | <i>S. lugdunensis</i>                |  | <i>S. lugdunensis</i>  |
| K2776 | <i>S. epidermidis</i>  |  | <i>S. epidermidis</i>                |  | <i>S. epidermidis</i>  |
| K2788 | <i>S. epidermidis</i>  |  | <i>S. epidermidis</i>                |  | <i>S. epidermidis</i>  |
| K2795 | <i>S. epidermidis</i>  |  | <i>S. epidermidis</i>                |  | <i>S. epidermidis</i>  |
| K2798 | <i>S. epidermidis</i>  |  | <i>S. epidermidis</i>                |  | <i>S. epidermidis</i>  |
| K2801 | <i>S. hominis</i>      |  | <i>S. hominis</i> ss novobiosepticus |  | <i>S. epidermidis</i>  |
| K2820 | <i>S. epidermidis</i>  |  | <i>S. epidermidis</i>                |  | <i>S. epidermidis</i>  |
| K2830 | <i>Micrococcus</i> spp |  | <i>S. capitis</i> ss urealyticus     |  | <i>S. pettenkoferi</i> |
| K2838 | <i>S. caprae</i>       |  | <i>S. capitis</i> ss urealyticus     |  | <i>S. capitis</i>      |
| K2861 | <i>S. epidermidis</i>  |  | <i>S. epidermidis</i>                |  | <i>S. epidermidis</i>  |
| K2888 | <i>S. caprae</i>       |  | <i>S. capitis</i> ss urealyticus     |  | <i>S. aureus</i>       |
| K2894 | <i>S. epidermidis</i>  |  | <i>S. epidermidis</i>                |  | <i>S. epidermidis</i>  |
| K2907 | <i>S. epidermidis</i>  |  | <i>S. epidermidis</i>                |  | <i>S. epidermidis</i>  |
| K2911 | <i>S. epidermidis</i>  |  | <i>S. epidermidis</i>                |  | <i>S. epidermidis</i>  |
| K2912 | <i>S. warneri</i>      |  | <i>S. pasteurii</i>                  |  | <i>S. warneri</i>      |
| K2913 | <i>S. epidermidis</i>  |  | <i>S. epidermidis</i>                |  | <i>S. epidermidis</i>  |
| K2919 | <i>S. epidermidis</i>  |  | <i>S. epidermidis</i>                |  | <i>S. epidermidis</i>  |

|       |                        |  |                                             |  |                        |
|-------|------------------------|--|---------------------------------------------|--|------------------------|
| K2929 | <i>S. epidermidis</i>  |  | <i>S. epidermidis</i>                       |  | <i>S. epidermidis</i>  |
| K2930 | <i>S. epidermidis</i>  |  | <i>S. epidermidis</i>                       |  | <i>S. epidermidis</i>  |
| K2941 | <i>S. epidermidis</i>  |  | <i>S. epidermidis</i>                       |  | <i>S. epidermidis</i>  |
| K2964 | <i>S. epidermidis</i>  |  | <i>S. epidermidis</i>                       |  | <i>S. epidermidis</i>  |
| K2978 | <i>S. lugdunensis</i>  |  | <i>S. capitis</i> ss <i>urealyticus</i>     |  | <i>S. capitis</i>      |
| K2994 | <i>S. epidermidis</i>  |  | <i>S. epidermidis</i>                       |  | <i>S. epidermidis</i>  |
| K2997 | <i>S. epidermidis</i>  |  | <i>S. epidermidis</i>                       |  | <i>S. epidermidis</i>  |
| K2998 | <i>S. epidermidis</i>  |  | <i>S. epidermidis</i>                       |  | <i>S. epidermidis</i>  |
| K3001 | <i>S. warneri</i>      |  | <i>S. epidermidis</i>                       |  | <i>S. epidermidis</i>  |
| K3018 | <i>S. epidermidis</i>  |  | <i>S. epidermidis</i>                       |  | <i>S. epidermidis</i>  |
| K3034 | <i>S. epidermidis</i>  |  | <i>S. epidermidis</i>                       |  | <i>S. epidermidis</i>  |
| K3044 | <i>S. epidermidis</i>  |  | <i>S. epidermidis</i>                       |  | <i>S. epidermidis</i>  |
| K3076 | <i>S. epidermidis</i>  |  | <i>S. hominis</i> ss <i>novobiosepticus</i> |  | <i>S. epidermidis</i>  |
| K3098 | <i>S. epidermidis</i>  |  | <i>S. hominis</i> ss <i>novobiosepticus</i> |  | <i>S. epidermidis</i>  |
| K3103 | <i>S. epidermidis</i>  |  | <i>S. epidermidis</i>                       |  | <i>S. epidermidis</i>  |
|       |                        |  |                                             |  |                        |
| B843  | <i>S. epidermidis</i>  |  | <i>S. epidermidis</i>                       |  | <i>S. epidermidis</i>  |
| B852  | <i>S. warneri</i>      |  | <i>S. pasteurii</i>                         |  | <i>S. warneri</i>      |
| B861  | <i>S. epidermidis</i>  |  | <i>S. epidermidis</i>                       |  | <i>S. epidermidis</i>  |
| B864  | <i>S. epidermidis</i>  |  | <i>S. epidermidis</i>                       |  | <i>S. epidermidis</i>  |
| B875  | <i>S. epidermidis</i>  |  | <i>S. epidermidis</i>                       |  | <i>S. epidermidis</i>  |
| B907  | <i>S. epidermidis</i>  |  | <i>S. epidermidis</i>                       |  | <i>S. epidermidis</i>  |
| B914  | <i>S. epidermidis</i>  |  | <i>S. epidermidis</i>                       |  | <i>S. epidermidis</i>  |
| B921  | <i>S. epidermidis</i>  |  | <i>S. epidermidis</i>                       |  | <i>S. epidermidis</i>  |
| B947  | <i>S. haemolyticus</i> |  | <i>S. haemolyticus</i>                      |  | <i>S. haemolyticus</i> |
| B948  | <i>S. epidermidis</i>  |  | <i>S. epidermidis</i>                       |  | <i>S. epidermidis</i>  |
| B949  | <i>S. epidermidis</i>  |  | <i>S. epidermidis</i>                       |  | <i>S. epidermidis</i>  |
| B1006 | <i>S. aureus</i>       |  | <i>S. capitis</i> ss <i>urealyticus</i>     |  | <i>S. warneri</i>      |
| B1070 | <i>S. aureus</i>       |  | <i>S. epidermidis</i>                       |  | <i>S. epidermidis</i>  |
| B1083 | <i>S. aureus</i>       |  | <i>S. epidermidis</i>                       |  | <i>S. epidermidis</i>  |
| B1107 | <i>S. aureus</i>       |  | <i>S. lugdunensis</i>                       |  | <i>S. haemolyticus</i> |
| B1110 | <i>S. epidermidis</i>  |  | <i>S. epidermidis</i>                       |  | <i>S. haemolyticus</i> |
| B1119 | <i>S. lugdunensis</i>  |  | <i>S. lugdunensis</i>                       |  | <i>S. epidermidis</i>  |
| B1177 | <i>S. epidermidis</i>  |  | <i>S. epidermidis</i>                       |  | <i>S. epidermidis</i>  |
| B1267 | <i>S. epidermidis</i>  |  | <i>S. epidermidis</i>                       |  | <i>S. epidermidis</i>  |
| B1268 | <i>S. epidermidis</i>  |  | <i>S. epidermidis</i>                       |  | <i>S. epidermidis</i>  |
| B1309 | <i>S. epidermidis</i>  |  | <i>S. epidermidis</i>                       |  | <i>S. epidermidis</i>  |
| B1344 | <i>S. lugdunensis</i>  |  | <i>S. lugdunensis</i>                       |  | <i>S. lugdunensis</i>  |
| B1363 | <i>S. epidermidis</i>  |  | <i>S. epidermidis</i>                       |  | <i>S. epidermidis</i>  |
| B1369 | <i>S. epidermidis</i>  |  | <i>S. epidermidis</i>                       |  | <i>S. epidermidis</i>  |
| B1379 | <i>S. capitis</i>      |  | <i>S. capitis</i> ss <i>urealyticus</i>     |  | <i>S. capitis</i>      |
| B1388 | <i>S. epidermidis</i>  |  | <i>S. hominis hominis</i>                   |  | <i>S. hominis</i>      |
| B1389 | <i>S. aureus</i>       |  | <i>S. saprophyticus</i>                     |  | <i>S. pasteurii</i>    |
| B1390 | <i>S. aureus</i>       |  | <i>S. caprae</i>                            |  | <i>S. caprae</i>       |

|       |                       |  |                       |  |                        |
|-------|-----------------------|--|-----------------------|--|------------------------|
| B1439 | <i>S. epidermidis</i> |  | <i>S. epidermidis</i> |  | <i>S. epidermidis</i>  |
| B1461 | <i>S. hominis</i>     |  | <i>S. warneri</i>     |  | <i>S. haemolyticus</i> |

|       |                                         |  |                                         |  |                        |
|-------|-----------------------------------------|--|-----------------------------------------|--|------------------------|
| B1472 | <i>S. epidermidis</i>                   |  | <i>S. epidermidis</i>                   |  | <i>S. epidermidis</i>  |
| B1483 | <i>S. epidermidis</i>                   |  | <i>S. epidermidis</i>                   |  | <i>S. epidermidis</i>  |
| B1522 | <i>S. epidermidis</i>                   |  | <i>S. epidermidis</i>                   |  | <i>S. epidermidis</i>  |
| B1523 | <i>S. caprae</i>                        |  | <i>S. capitis</i> ss <i>urealyticus</i> |  | <i>S. caprae</i>       |
| B1541 | <i>S. warneri</i>                       |  | <i>S. haemolyticus</i>                  |  | <i>S. epidermidis</i>  |
| B1542 | <i>S. chromogenes</i>                   |  | <i>S. epidermidis</i>                   |  | <i>S. epidermidis</i>  |
| B1543 | <i>S. epidermidis</i>                   |  | <i>S. epidermidis</i>                   |  | <i>S. epidermidis</i>  |
| B1547 | <i>S. haemolyticus</i>                  |  | <i>S. haemolyticus</i>                  |  | <i>S. haemolyticus</i> |
| B1554 | <i>S. epidermidis</i>                   |  | <i>S. epidermidis</i>                   |  | <i>S. epidermidis</i>  |
| B1560 | <i>S. epidermidis</i>                   |  | <i>S. epidermidis</i>                   |  | <i>S. epidermidis</i>  |
| B1568 | <i>S. epidermidis</i>                   |  | <i>S. epidermidis</i>                   |  | <i>S. epidermidis</i>  |
| B1637 | <i>S. epidermidis</i>                   |  | <i>S. epidermidis</i>                   |  | <i>S. epidermidis</i>  |
| B1651 | <i>S. hominis</i>                       |  | <i>S. epidermidis</i>                   |  | <i>S. epidermidis</i>  |
| B1656 | <i>S. epidermidis</i>                   |  | <i>S. epidermidis</i>                   |  | <i>S. epidermidis</i>  |
| B1677 | <i>S. cohnii</i> ssp <i>urealyticus</i> |  | <i>S. cohnii</i> ss <i>urealyticus</i>  |  | <i>S. cohnii</i>       |
| B1695 | <i>S. epidermidis</i>                   |  | <i>S. epidermidis</i>                   |  | <i>S. epidermidis</i>  |
| B1739 | <i>S. epidermidis</i>                   |  | <i>S. epidermidis</i>                   |  | <i>S. epidermidis</i>  |
| B1767 | <i>S. epidermidis</i>                   |  | <i>S. hominis</i>                       |  | <i>S. hominis</i>      |
| B1725 | <i>S. sciuri</i>                        |  | <i>S. lugdunensis</i>                   |  | <i>S. lugdunensis</i>  |
| B1812 | <i>S. epidermidis</i>                   |  | <i>S. epidermidis</i>                   |  | <i>S. epidermidis</i>  |
