# Supplementary material for: Speciation and Antibiotic Susceptibilities of Coagulase Negative Staphylococci Isolated from Ocular Infections
Source: Antibiotics (Basel). 2021 Jun 16;10(6):721. doi: 10.3390/antibiotics10060721 (PMC8234609; doi:10.3390/antibiotics10060721)
Supplement: Supplementary file 1 [file antibiotics-10-00721-s001.zip › Table S2 (Kowalski) supplemental Sequence Data 05262021.xlsx]

## Sheet: John
Table S2. (Kowalski) Supplemental Sequence Data of 150 CoNS ocular isolates (Case, Identity, Percent ID, Maximum Score, Sequence).
Case/Isolate ID#	Sample Origin	Identity	Percent IDa	Max Scoreb	Sequence
ATCC 1	ATCC 700403	S. lentus	97.98	778	NACCGACCATTCNGATGAAAGAGACNATGGAGATTCNTCATACGAAACACCATAACACTTATGTAACAGAACTAAATGATGCAGTTAAAGGTACTGACTTAGAAAGTAAATCTATTGAAGATATTATTAAAAACTTAAATTCTGTACCAGATGATATCCGTACTGCAGTTCAAAACAATGGTGGCGGACATTACAATCACTCATTATTCTGGGAGATGTTAACTCCAAATGCTTCTGAACCATCAGGCGAAGTAGTAGATGCAATCAGTTCTACTTTCGGTTCATTAGACAAATTTAAAGAAGAGTTTGCAGCAGCAGCAGCTGGACGCTTCGGTTCAGGTTGGGCATGGTTAGTTGTAGATAACGGTGAATTATCNATCGTTTCAACTCCAAACCAAG…
ATCC 2	ATCC 700404	S. xylosus	96.84	752	NNNNNTTGATCAACAAACAATGGAAATTCACCATGGCAAACACCATAACACTTATGTAACTAAATTAAACGCAGCAGTAGAAGGAACTGATTTAGAATCTAAATCAATTGAAGAAATTGTTGCAAATCTAGACAGTGTTCCAGAAAACATTCAAACAGCTGTTCGTAATAATGGCGGTGGACATTTAAACCACTCATTATTCTGGGAATTATTAACTCCAAACTCAGAAGAAAAAGGTACTGTTGTTGATAAAATTAAAGAACAATGGGGTTCTTTANATGCATTTAAAGAANAATTTGCANACAAAGCANCATCACGTTTCGGTTCAGGTTGGGCATGGTTACTATTTAATAACGGTAACTTATAAATTGTTACTACNCCTAACCAANACAATCCAAT…
ATCC 3	ATCC 12228	S. epidermidis	95.17	645	AANNGNGCNNNCTGACGAGGTAANGATGGAAATTCTACATNGACCCGATCTCGANTTCTTAGTTAANAATTAAATTCANCNGTTGAAGGGACAGATTTAGAAGCTAAATCAATCGAAGAAATTGTTGCTAATTTAGATAGTGTGCCATCTAATATTCAAACAGCTGTTCGTAATAATGGCGGTGGTCACCTTAACCATTCATTGTTCNGGGAACTATTATCACCAAATTCNGAAGAAAAAGGTGAAGTAGTANATAAAATTAAAGAACAATGGGGTTCTTTAGATGAATTTNAAAAAGAATTTGCANATAAAGCTGCNNCACGCTTTGGTTCAGGATGGGCTTGGTTAGTTGTAAACNATGGACAATTATAAATTGTTACAACACCAAATCNAGANAAT…
ATCC 4	ATCC 35661	S. capitis	93.13	660	NNCCNCNNTNTNGNTNNAAAAAATNTNGGNNTTCNCCNTGACNAACNCCTNNACACATTGTAACTNAATTAAACTCNGCAGTTGAAGGAACAGATTTAGAAGCTAAATCAATCGAAGAAATTGTTGCTAATTTAGATAGCGTACCTTCAGATATTCAAACTGCAGTACGTAATAATGGTGGCGGTCACTTAAACCACTCATTATTCTGGGAATTATTATCACCAAATTCNGAAGAAAAAGGTGAAGTANTAGACAAAATTAAAGAACAATGGGGTTCTTTAAATGAATTCANAAAANAATTTGCAGATAAAGCTGCTGCACGCTTTGGATCTGGTTGGGCATGGTTAGTANTAAATAACGGTCAATTATAAATCGTTACTACTCCAAACCNNGATNACC…
B843	Blepharitis/Conjunctivitis	S. epidermidis	97.95	756	AAACAACANNCNGANNAAACAAACCATGGAAATTCATCATGACAAACACCATAACACATATGTTACAAAATTAAATTTCAGCAGTTTGAAGGGACAGATTTAGAAGCTAAATCAATCGAAGAAATTNGTTNGCTAATTTAGATAGTGTGCCATCTAATATTCAAACAGCTGTTCGTAATAATGGCGGTGGACACCTTAACCATTCATTGTTCTGGGAACTATTATCACCAAATTCTGAAGAAAAAGGTGAAGTTGTAGATAAAATAAAAGAACAATGGGGTTCTTTAGACGAATTTAAAAAAGAATTTGCAGATAAAGCTGCAGCACGCTTTGGTTCAGGATGGGCTTGGTTAGTTGTAAACAATGGACAATTANAAATTGTTACAACACCAAATCAAG…
B852	Blepharitis/Conjunctivitis	S. warneri	98	784	ACCACCATTCCGANAAAGAAACNATGGAGATTCACCATGATAAACACCACAACACTTATGTAACAAAATTAAATGCAGCTGTAGAAGGTACTGACTTAGAAGCTAAATCAATCGAAGAAATTGTAGCTAACTTAGATAGTGTTCCTTCTGATATTCAAACTGCAGTAAGAAATAACGGTGGCGGACACTTAAACCACTCATTATTCTGGGAATTATTAACACCTAATTCAGAAGAAAAAGGTGAAGTAGTAGATAAAATTAAAGAACAATGGGGTTCTTTAGATGAATTCAAAAAAGAATTCGCTGACAAAGCTGCAGCTCGTTTTGGTTCAGGTTGGGCTTGGTTAGTTGTTAATAATGGTCAATTANAAATCGTTACAACTCCAAACCAAGATAACC…
B861	Blepharitis/Conjunctivitis	S. epidermidis	97.71	760	ANCACCATTCCGACCAACAAACNNATGGAAATTNNNCATGACAAACATCATAACACATATGTTACAAAATNAAATTCAGCAGTTGAAGGGACAGATTTAGAAGCTAAATCAATCGAAGAAATTNGTTGCTAATTTAGATAGTGTGCCATCTAATATTCAAACAGCTGTTCGTAATAATGGCGGTGGTCACCTTAACCATTCATTGTTCTGGGAACTATTATCACCAAATTCTGAAGAAAAAGGTGAAGTAGTAGATAAAATTAAAGAACAATGGGGTTCTTTAGATGAATTTAAAAAAGAATTTGCAGATAAAGCTGCAGCACGCTTTGGTTCAGGATGGGCTTGGTTAGTTGTAAACAATGGACAATTAGAAATTGTTACAACACCAAATCAAGATAA…
B864	Blepharitis/Conjunctivitis	S. epidermidis	94.53	699	ACCCACCATTNCCGACCAACAAACCNATNGGAAATNCCNNNCATGACNAACANCATAACACATANGTACAAAATAAATNCAGCAGTNGAAGGGACAGANTTAGAAGCTAAATCAATCGAAGAAATNGTNGCTAATTTAGATAGTGNGCCATCTAATATTCAAACAGCTGTTCGTAATAATGGCGGTGGTCACCTTAACCATTCATTGTTCTGGGAACTATTATCACCAAATTCTGAAGAAAAAGGTGAAGTAGTAGATAAAATTAAAGAACAATGGGGTTCTTTAGATGAATTTAAAAAAGAATTTGCAGATAAAGCTGCAGCACGCTTTGGTTCAGGATGGGCTTGGTTAGTTGTAAACAATGGACAATTANAAATTGTTACAACACCAAATCAAGAT…
B875	Blepharitis/Conjunctivitis	S. epidermidis	96.85	750	NCACATTCCGACAACAAACTATGGAAATTNCTCATGACNAACNNCATAACACATATGTTACAAAATTTAAATTCAGCAGTTGAAGGGACAGATTTAGAAGCTAAATCAATCGAAGAAATTNGTTGCTAATTTAGATAGTGTGCCATCTAATATTCAAACAGCTGTTCGTAATAATGGCGGTGGTCACCTTAACCATTCATTGTTCTGGGAACTATTATCACCAAATTCTGAAGAAAAAGGTGAAGTAGTAGATAAAATTAAAGAACAATGGGGTTCTTTAGATGAATTTAAAAAAGAATTTGCAGATAAAGCTGCAGCACGCTTTGGTTCAGGATGGGCTTGGTTAGTTGTAAACAATGGACAATTANAAATTGTTACAACACCAAATCAAGATAATCC…
B907	Blepharitis/Conjunctivitis	S. epidermidis	98.21	787	NCACATCGACAACNAACTATGGAAATTCNTCATGACNAACATCATAACACATATGTTACAAAATTAAATTCAGCAGTTGAAGGGACAGATTTAGAAGCTAAATCAATCGAAGAAATTGTTGCTAATTTAGATAGTGTGCCATCTAATATTCAAACAGCTGTTCGTAATAATGGCGGTGGTCACCTTAACCATTCATTGTTCTGGGAACTATTATCACCAAATTCTGAAGAAAAAGGTGAAGTAGTAGATAAAATTAAAGAACAATGGGGTTCTTTAGATGAATTTAAAAAAGAATTTGCAGATAAAGCTGCAGCACGCTTTGGTTCAGGATGGGCTTGGTTAGTTGTAAACAATGGACAATTAGAAATTGTTACAACACCAAATCAAGATAATCCAATT…
B914	Blepharitis/Conjunctivitis	S. epidermidis	95.01	715	NCACATCGACNAACNAACNATGGAAATTNCTNCATGACNAACATCATAACACATATNTAAAAATNAAATTCAGCAGTNGAAGGGACAGATTAGAAGCTAAATCAATCGAAGAAATNGTNGNTAATNNAGATAGTGNGCCATCTAATATTCAAACAGCTGTTCGTAATAATGGCGGTGGTCACCTTAACCATTCATTGTTCTGGGAACTATTATCACCAAATTCTGAAGAAAAAGGTGAAGTAGTAGATAAAATTAAAGAACAATGGGGTTCTTTAGATGAATTTAAAAAAGAATTTGCAGATAAAGCTGCAGCACGCTTTGGTTCAGGATGGGCTTGGTTAGTTGTAAACAATGGACAATTANAAATTGTTACAACACCAAATCAAGATAATCCAATTA…
B921	Blepharitis/Conjunctivitis	S. epidermidis	98.24	795	AANACCACATNCNGACNAACAAACTATGGAAATTCATCATGACAAACATCATAACACATATGTTACAAAATTAAATTCAGCAGTTGAAGGGACAGATTTAGAAGCTAAATCAATCGAAGAAATTGTTGCTAATTTAGATAGTGTGCCATCTAATATTCAAACAGCTGTTCGTAATAATGGCGGTGGTCACCTTAACCATTCATTGTTCTGGGAACTATTATCACCAAATTCTGAAGAAAAAGGTGAAGTAGTAGATAAAATTAAAGAACAATGGGGTTCTTTAGATGAATTTAAAAAAGAATTTGCAGATAAAGCTGCAGCACGCTTTGGTTCAGGATGGGCTTGGTTAGTTGTAAACAATGGACAATTAGAAATTGTTACAACACCAAATCAAGATAA…
B947	Blepharitis/Conjunctivitis	S. haemolyticus	97.74	769	GAANAAACAAACNANGGAAAACANCATGACAAACACCACAACACGTATGTTACCAAATNAAATTCTGCAGTTGAGGGAACAGATCTTGAATCTAAATCAATTGAAGAAATTGTTGCTAATTTAGATAGTGTACCTGAAGATATTCAAACAGCTGTTCGTAATAATGGTGGCGGACACTTAAATCACTCATTATTCTGGGAATTATTAACTCCTAATTCTGAAGAAAAAGGTACTGTTGTTGATAAAATCAAAGAACAATGGGGCTCTTTAGATGAATTCAAAAAAGAATTCGCTGACAAAGCANCAGCTCGTTTCGGTTCAGGTTGGGCATGGTTAGTAGTTAACAATGGTCAGTTAGAAATTGTTACTACACCTAACCAAGATAACCCATTAACGGAA…
B948	Blepharitis/Conjunctivitis	S. epidermidis	89.37	603	NCCACATNNCGACNAACAAACNATGGAAANNANNATGACAAACANCAAACACANAAGAACAAAAAAAANAAGCAGNAGAAGGGACAGATNAGAAGCAAATCAATCGAAGAAATNGTNGCTAATTNAGATAGNGNGCCATCTAATATTCAAACAGCTGTTCGTAATAATGGCGGTGGTCACCTTAACCATTCATTGTTCTGGGAACTATTATCACCAAATTCTGAAGAAAAAGGTGAAGTAGTANATAAAATTAAAGAACAATGGGGTTCTTTAGATGAATTTAAAAAAGAATTTGCAGATAAAGCTGCNNCACGCTTTGGTTCAGGATGGGCTTGGTTANTTGTAAACNATGGACNATTATAAATTGTTACAACACCAAATCNNNATNATCCNATTACT…
B949	Blepharitis/Conjunctivitis	S. epidermidis	93.3	569	NNNNANNNNNCGACAACAAACNANGGAAAANAGCANGACAAANANNAAANCAGANGAACAAAAAAAANNAGCAGNNGAAGGGACAGATNNAGAAGCTAAATCAATCGAAGAAATNGTNGCTAATTTAGATAGTGTGCCATCTAATATTCAAACAGCTGTTCGTAATAATGGCGGTGGTCACCTTAACCATTCATTGTTCTGGGAACTATTATCACCAAATTCTGAAGAAAAAGGTGAAGTANNANATAAAATTAAAGAACAATGGGGTTCTTTANATGAATTTAAAAAAGAATTTGCANATAAAGCTGCNNCACGCTTTGGTTCAGGATGGGCTTGGTTANTTGTAAACGATGNACNATTATAAATTGTTACAACACCAAATCNNNATAATCCAATTAC…
B1006	Blepharitis/Conjunctivitis	S. warneri	95.57	717	NNNNNNNNNNNNNNAANNAACTATGGAGATTCACCATGATAAACACCACAACACTTATGTAACAAAATTAAANNCTGCAGTAGAAGGTACTGACTTAGAAGCTAAATCAATTGAAGAAATTGTNGCTAATTTAGATAGNGTGCCTTCNNATATTCAAACTGCNGTANGAAACAATGGTGGNGGACACTTNAACCANTCATTATTCTGGGAATTATTAACACCTAATTCAGAAGAAAAAGGTGAAGTAGTAGATAAAATTAAAGAACAATGGGGTTCTTTAGATGAATTTAAAAAAGAATTNGCTGANAAAGCTGCAGCTCGCTTTGGTTCAGGTTGGGCTTGGTTAGTTGTTAATAACGGTCAATTANAAATNGTAACAACTCCNAACCAAGATAATCC…
B1070	Blepharitis/Conjunctivitis	S. epidermidis	97.35	773	CANCATNCGACAACAAACTATGGAANTCATCATGACAAACATCATAACACATATGTTACAAAATTAAATTCAGCAGTTGAAGGGACAGATTTAGAAGCTAAATCAATCGAAGAAATNGTTGCTAATTTAGATAGTGTGCCATCTAATATTCAAACAGCGGTTCGTAATAATGGCGGTGGTCACCTTAACCATTCATTGTTCTGGGAACTATTATCACCAAATTCTGAAGAAAAAGGTGAAGTAGTAGATAAAATTAAAGAACAATGGGGTTCTTTAGATGAATTTAAAAAAGAATTTGCAGATAAAGCTGCAGCACGCTTTGGTTCAGGATGGGCTTGGTTAGTTGTAAACAATGGACAATTAGAAATTGTTACAACACCAAATCAAGATAATCCAATT…
B1083	Blepharitis/Conjunctivitis	S. epidermidis	95.17	691	NCCCNANNNTNCCGNACGAAAGTAACGATGGAAATTNCTNCATGACAAACATCNTNAATTCTTTGTTNAAGAANTAAATTCNCAGTTGAAAGGACAGATTTAGAAGCTAAATCAATCGAAGAAATTGTTGCTAATTTAGATAGTGTGCCATCTAATATTCAAACAGCTGTTCGTAATAATGGCGGTGGTCACCTTAACCATTCATTGTTCTGGGAACTATTATCACCAAATTCTGAAGAAAAAGGTGAAGTAGTAGATAAAATTAAAGAACAATGGGGTTCTTTAGATGAATTTAAAAAAGAATTTGCAGATAAAGCTGCAGCACGCTTTGGTTCAGGATGGGCTTGGTTAGTTGTAAACAATGGACAATTAGAAATTGTTACAACACCAAATCAAGAT…
B1107	Blepharitis/Conjunctivitis	S. haemolyticus	98.46	797	NCACATTGACAACAAACTATGGAAATCCCATCATGACAAACACCACAACACGTATGTTACCAAATTAAATTCTGCAGTTGAGGGAACAGATCTTGAATCTAAATCAATTNGAAGAAATTNGTTGCTAATTTAGATAGTGTACCTGAAGATATTCAAACAGCTGTTCGTAATAATGGTGGCGGACACTTAAATCACTCATTATTCTGGGAATTATTAACTCCTAATTCTGAAGAAAAAGGTACTGTTGTTGATAAAATCAAAGAACAATGGGGCTCTTTAGATGAATTCAAAAAAGAATTCGCTGACAAAGCAGCAGCTCGTTTCGGTTCAGGTTGGGCATGGTTAGTAGTTAACAATGGTCAGTTAGAAATTGTTACTACACCTAACCAAGATAACCCA…
B1110	Blepharitis/Conjunctivitis	S. haemolyticus	90.09	634	NNNNACATTTNGACNAACAAACTATGGAAANCCATCATGACNAACACCACAACACGTATGTTACCAAATTAAATTCTGCAGTTGAGGGAACAGATCTTGAATCTAAATCAATTGAANAAATTGTTGCTAATTTAAATAGTGTACCTGAANATATTCAAACAGCTGTTCNTAATAATGGTGGCGGACACTTAAATCACTCATTATTCNGGGAATTATTAACTCCTAATTCNGAANAAAAAGGTACTGTTGTTGATAAAATCAAAGAACAATGGGGCTCTTTANATGAATTCNNAAAANAATTCNCTGACAAAGCANCANTTCGTTTCNGTTCAAGTTGGGNATGGTTANTACTTAANAATGGTNANTTNTAAATTGTTACTACNCCATNCCNNNATAACC…
B1119	Blepharitis/Conjunctivitis	S. epidermidis	93.61	678	NNNNANGNNNNNNANNAANCAAACNANGGAAANGAANCATGAAAACANCANAACACANANGNACAAAAAAAATNAGTAGNNGAANGGACAGATTTAGAAGCTAAATCAATCGAAGAAATTGNTGCTAATTTAGATAGTGTGCCATCTAATATTCAAACAGCTGTTCGTAATAATGGCGGTGGTCACCTTAACCATTCATTGTTCTGGGAACTATTATCACCAAATTCTGAAGAAAAAGGTGAAGTAGTAGATAAAATTAAAGAACAATGGGGTTCTTTAGATGAATTTAAAAAAGAATTTGCAGATAAAGCTGCAGCACGCTTTGGTTCAGGATGGGCTTGGTTAGTTGTAAACAATGGACAATTATAAATTGTTACAACACCAAATCAAGATAATCCA…
B1177	Blepharitis/Conjunctivitis	S. epidermidis	97.52	761	NCCANCATTCCGACAACAAACTATGGAAATNATCATGACAAACATCATAACACATATGTNACAAAATNAAATTCAGCAGTTTGAAGGGACAGATTTAGAAGCTAAATCAATCGAAGAAATTGTTGCTAATTTAGATAGTGTGCCATCTAATATTCAAACAGCTGTTCGTAATAATGGCGGTGGTCACCTTAACCATTCATTGTTCTGGGAACTATTATCACCAAATTCTGAAGAAAAAGGTGAAGTAGTAGATAAAATTAAAGAACAATGGGGTTCTTTAGATGAATTTAAAAAAGAATTTGCAGATAAAGCTGCAGCACGCTTTGGTTCAGGATGGGCTTGGTTAGTTGTAAACAATGGACAATTATAAATTGTTACAACACCAAATCAAGATAATCC…
B1267	Blepharitis/Conjunctivitis	S. epidermidis	93.3	680	ANCCANCATNNCCGACNAACAAACNATNGGAAATCCATCATGACAAACATCATAACACATANNGCACAAAANAATCCAGCAGNCGAAGGGACAGANNAGAAGCTAAATCAATCGAAGAAATCGTCGCTAATCAGATAGTGNGCCATCTAATATTCAAACAGCNGTTCGTAATAATGGCGGTGGTCACCTTAACCATTCATTGTTCTGGGAACTATTATCACCAAATTCTGAAGAAAAAGGTGAAGTAGTAGATAAAATTAAAGAACAATGGGGTTCTTTAGATGAATTTAAAAAAGAATTTGCAGATAAAGCTGCAGCACGCTTTGGTTCAGGATGGGCTTGGTTAGTTGTAAACAATGGACAATTANAAATTGTTACAACACCAAATCAAGATAATCC…
B1268	Blepharitis/Conjunctivitis	S. epidermidis	95.19	708	AACACCATTNCCGANCAACAAACNATGGAAATCATCATGACAAACANCATAACACATANGNCCAAAATAAATNAGCAGTNGAAGGGACAGATNTAGAAGCTAAATCAATCGAAGAAATNGTNGCTAATTTAGATAGTGTGCCATCTAATATTCAAACAGCTGTTCGTAATAATGGCGGTGGTCACCTTAACCATTCATTGTTCTGGGAACTATTATCACCAAATTCTGAAGAAAAAGGTGAAGTAGTAGATAAAATTAAAGAACAATGGGGTTCTTTAGATGAATTTAAAAAAGAATTTGCAGATAAAGCTGCAGCACGCTTTGGTTCAGGATGGGCTTGGTTAGTTGTAAACNATGGACAATTATAAATTGTTACAACACCAAATCAAGATAATCCAA…
B1309	Blepharitis/Conjunctivitis	S. epidermidis	92.39	294	GGNNNNNNNNNNNNNNGNNNNNNNNNNTTNNANNNCNCNNCNAAACAANCANGGGNAATTCATCATGAACNAACATCCCTAACACATATGTTACAAAATTAAATTCAGCAGTTGAAGGGACAGATTTAGAAGCTAAATCAATCGAAGAAATTGTTGCTAATTTAGATAGTGTGCCATCTAATATTCAAACACCTGTTCGTTAATAATGGCGGGTGGACNCCTTANCCNTTCNTTGTTCNGGNANTTATTANCNCNANNTTCNNANAAAAANNGTNANNTNNNANANAANNTNAAANANCAANGGGNNTNNTTNANATNANTTNAAAAAAAANTTTNNAAAANNNNCCNCNNCNCNNNTNGNTTCNNGANGGNCNTGNNTNNTTNNANCNNGGAANNNTN…
B1344	Blepharitis/Conjunctivitis	S. lugdunensis	88.89	449	AAACCAAAGCGGTTACACGNTAGANCACATATTGATGATAAACCTGGAATCCTCATGATCATNATCATAATACGTATGTGACTANATTNAATTCTGCATTTGAAGGTACCGACTTANAGTCTAAATCTATTGAGGAAATTATTGCCAATTTAAATANCGTTCCNGAAAACATTCAAACCCCTGTACGTAATAATGGTGGCGGACACTTAAACCATTCACTATTCTGGGAATTTTTAACTCCCACTTCTGAATAAAATGGTACTGTAGTTGATAAAATTAAANAACAATGGGGTTCTTTAGATGAATTCAANAAAGAATTCACTGAGCAANCTGCTCGTCGTTTTGTTCNNGTTGGGANGGTTACTTTTAANTCAAAATNTATTTTAATTTCTAACTGTT…
B1363	Blepharitis/Conjunctivitis	S. epidermidis	90.84	588	ANCNANCANNCNGACNAACAAANCANGGAAANNANNANGACNAACANCTAACACATANGNACAAAANAAANNNGCAGNNGAAGGGACAGATNAGAAGCAAACAATCGAAGAAATCGTCGCTAATNAGATAGNGNGCCATCTAATATNCAAACAGCNGTTCGTAATAATGGCGGTGGTCACCTTAACCATTCATTNGTTCTGGGAACTATTATCACCAAATTCTGAAGAAAAAGGTGAAGTAGTAGATAAAATTAAAGAACAATGGGGTTCTTTAGATGAATTTAAAAAAGAATTTGCAGATAAAGCTGCANCACGCTTTGGTTCAGGATGGGCTTGGTTAGTTGTAAACGATGGACAATTATAAATTGTTACAACACCAAATCANGATAATCCAATTAC…
B1369	Blepharitis/Conjunctivitis	S. epidermidis	92.17	645	AACCANCATTCNGACNAACAAACNNTGGAAATCNTCATGACAAACATCATAACACATATGTACAAAATAAATCAGCAGTNGAAGGGACAGATNNAGAAGTAAATCAATCGAAGAAATNGTNGCTAATTAGATAGTGTGCCATCTAATATTCAAACAGCTGTTCGTAATAATGGCGGTGGTCACCTTAACCATTCATTGTTCTGGGAACTATTATCACCAAATTCTGAAGAAAAAGGTGAAGTAGTANATAAAATTAAAGAACAATGGGGTTCTTTAGATGAATTTAAAAAAGAATTTGCANATAAAGCTGCNTCACGCTTTGGTTCAGGATGGGCTTGGTTANTTGTAAACGATGNACTATTATAAATTGTTACNACACCANATCNNTATAATCCAATT…
B1379	Blepharitis/Conjunctivitis	S. capitis	96.3	761	ACCACATNCTGATAAACAAACNNATGGAANTNCACCACGACAAACACCATAACACATATGTAACTAAATTAAACTCAGCAGTTTGAAGGAACAGATTTAGAAGCTAAATCAATCGAAGAAATCGTTNGCTAATTTAGATAGCGTACCTTCAGATATTCTAACTGCAGTACGTAATAATGGTGGCGGTCACTTAAACCACTCATTATTCTGGGAATTATTATCACCAAATTCTGAAGAAAAAGGTGAAGTAGTAGACAAAATTAAAGAACAATGGGGTTCTTTAGATGAATTCAAAAAAGAATTTGCAGATAAAGCTGCTGCACGCTTTGGATCTGGTTGGGCATGGTTAGTAGTAAATAACGGTCAATTANAAATCGTTACTACTCCAAACCAAGATAA…
B1388	Blepharitis/Conjunctivitis	S. hominis	96.27	760	CCACATTCGACNAAGAACNATGGAAATTCATCATGACAAACATCATAACACTTATGTTACAAAATTAAATTCTGCAGTTGAAGGTACTGATTTAGAATCTAAATCAATTGAAGAAATTGTTGCNAATTTAGATAGTGTACCTGANAATATTCAAACAGCAGTACGTAATAATGGTGGAGGTCATTTAAATCACTCATTATTCTGGGAATTATTAACTCCTAATTCTGAAGAAAAAGGTAATGTAATTGATAAAATTAAAGAACAATGGGGTTCTTTAGATGANTTTAAAAAAGAATTCGCTGATAAAGCTGCAGCACGTTTTGGTTCAGGNTGGGCTTGGTTAGTAGTAAATAATGGAAAATTAGAAATTGTTACTACTCCAAATCAAGATAACCCTAT…
B1389	Blepharitis/Conjunctivitis	S. pasteuri	95.68	737	ACANCATTCGATAAGAACTATGGAGATTCATCCATGATAAACATCCATAACACTTATGTAACAAAATTTAAATCTGCTGCAGTTTGAAGGTACTGATTTAGAAGCTAAATCAATCGAAGAAATTNGTAGCTAATTTTAGACAGTGTACCTTCTGATATCCAAACTGCTGTTAGAAATAATGGTGGCGGACACTTNAACCACTCATTATTCTGGGAATTACTAACACCTAANTCAGAAGAAAAAGGTGAAGTAGTAGATAAAATTAAAGAACAATGGGGTTCTTTAGATGAATTCAAAAAAGAATTTGCTGACAAAGCAGCAGCTCGTTTTGGTTCAGGTTGGGCTTGGTTAGTAGTAAATAACGGGCAATTAGAAATCGTTACAACTCCAAACCAAGAT…
B1390	Blepharitis/Conjunctivitis	S. caprae	93.95	693	ANCACATTNCGNATAAACAAACTATTGGAGATTACATACACAGACCAACACCATAACACATATGTAACTAGCATTAAACACAGCAGTTAGAAGGAACAGATTTAGAAGCTAAATCAATCGAAGAANTNGTTGCAAATTTANATNGCGTANCTTCTGATATTCAAACNGCAGTACGTAACAATGGTGGCGGTCACTTAAACCACTCATTATTCTGGGAATTATTATCNCCTAATTCTGAAGAAGAAGGTGAAGTTGTAGACNAAATCNAAGAACAATGGGGCTCTTTAGATGAATTCNAAAAAGAATTCGCTGACNAAGCAGCAGCTCGTTTCGGTTCAGGTTGGGCTTGGTTAGTATTAAACNACGGTCAATTAAAAATCGTAACTACACCAAACCAAG…
B1439	Blepharitis/Conjunctivitis	S. epidermidis	97.07	756	AACACATNCCGACNAACAAACTATGGAAATTCATCATGACAAACATCATAACACATATGTTACAAAATTAAATTNCAGCAGTTGAAGGGACAGATTTAGAAGCTAAATCAATCGAAGAAATTGTTGCTAATTTAGATAGTGTGCCATCTAATATTCAAACAGCTGTTCGTAATAATGGCGGTGGTCACCTTAACCATTCATTGTTCTGGGAACTATTATCACCAAATTCTGAAGAAAAAGGTGAAGTAGTAGATAAAATTAAAGAACAATGGGGTTCTTTAGATGAATTTAAAAAAGAATTTGCAGATAAAGCTGCANCACGCTTTGGTTCAGGATGGGCTTGGTTANTTGTAAACGATGGACAATTATAAATTGTTACAACACCAAATCANNATAATC…
B1461	Blepharitis/Conjunctivitis	S. haemolyticus	93.39	662	NACNACNANANTGANCAACAAACNATGGAAANCCATCATGACAAACACCACAACACTTATGNACTAAATTAAATTNCTGCAGTTGAGGGTACAGATCTTGAATCTAAATCAATTNGAAGAAATTNGTTGCTAACTTAGATAGTGTACCTGAAGATATTCAAACAGCTGTTCGTAATAATGGTGGCGGACACTTAAATCACTCATTATTCTGGGAATTATTAACTCCTAATTCTGAAGAAAAAGGTACTGTTGTTGATAAAATTAAAGAACAATGGGGCTCTTTAGACGAATTCAAAAAAGAATTTGCTGATAAAGCANCAGCTCGTTTCGGTTCAGGTTGGGCTTGGTTAGTANTTAATAATGGTCAATTANAAATTGTTACTACACCAAACCAANATA…
B1472	Blepharitis/Conjunctivitis	S. epidermidis	91.7	667	NNNNACACATTCCGACNAACAAACNATGGAAATTCATCATGACAAACATCATAACACATATGTTACAAAATTAAATTCAGCAGTTGAAGGGACAGATTTAGAAGCTAAATCAATCGAAGAAATTGTTGCTAATTTAGATAGTGTGCCATCTAATATTCAAACAGCTGTTCGTAATAATGGCGGTGGTCACCTTAACCATTCATTGTTCTGGGAACTATTATCACCAAATTCTGAANAAAAAGGTGAAGTANTANATAAAATTAAAGAACAATGGGGTTCTTTANATGAATTTNAAAAANAATTTGCANATAAAGCTGCNTCACCCTTTGGTTCAGGATGGGCTTGGTTANTTGNAAACGATGGACNATTATAANTTGTTACNNCNNCAAANCNNNANAA…
B1483	Blepharitis/Conjunctivitis	S. epidermidis	91.57	664	NNNNTCGACNAACAAACTATGGAAATTCATCATGACAAACATCATAACACATATGTTACAAAATTAAATTCAGCAGTTGAAGGGACAGATTTAGAAGCTAAATCAATCGAAGAAATTGTTGCTAATTTAGATAGTGTGCCATCTAATATTCAAACAGCTGTTCGTAATAATGGCGGTGGTCACCTTAACCATTCATTGTTCTGGGAACTATTATCACCAAATTCNGAANAAAAAGGTGAAGTNGTANATAAAATTAAAGAACAATGGGGTTCTTTANATGAATTTNAAAAAGAATTTGCANATAAAGCTGCNNCACGCTTTGGTTCAGGATGGGCTTGGTTANTTGNAAACGNTGGACNATTATAANTTGTTACNNCNNCAAATCGNNANNATCNAATT…
B1522	Blepharitis/Conjunctivitis	S. epidermidis	92.51	643	NNNNNNNNANNANAAACTATGGAAATTCATCATGACAAACATCATAACACATATGTTACAAAATTAAATTCAGCAGTTGAAGGGACAGATTTAGAAGCTAAATCAATCGAAGAAATTGTTGCTAATTTAGATAGTGTGCCATCTAATATTCAAACAGCTGTTCGTAATAATGGCGGTGGTCACCTTAACCATTCATTGTTCTGGGAACTATTATCACCAAATTCNGAANAAAAAGGTGAAGTANTAGATAAAATTAAAGAACAATGGGGTTCTTTANATGAATTTAAAAAANAATTTGCANATAAAGCTGCNTCACNCTTTGGTTCAGGATGGGCTTGGTTANTTGNAAACGATGAACAANTATAAATTGNTACNNCNCCANANCNNNANNATCCNATT…
B1523	Blepharitis/Conjunctivitis	S. caprae	95.06	712	NNNNNNNCGNANAAAACNAACTATTGNGANGANTNCATACACAGANCNAACACCATAACACATATGTAACTAAATTAAACTCAGCAGTTGAAGGAACAGATTTANAAACTAAATCAATCGAAGAAATTGTTGCAAATTNAAATAGCGTACCTTCTGATATTCAAACAGCAGTACGTAACAATGGTGGCGGTCACTTAAACCACTCATTATTCTGGGAATTATTATCACCTAATTCTGAANAAAAAGGTGAAGTTGTAGACAAAATCAAAGAACAATGGGGCTCTTTAGATGAATTCAAAAAAGAATTCGCTGACAAAGCANCAGCTCGTTTCGGTTCAGGTTGGGCTTGGTTANTANTAAACAACGGTCAATTATAAATCNTAACTACACCAAACCAGG…
B1541	Blepharitis/Conjunctivitis	S. epidermidis	96.51	728	NNNNNNNNNACAAACTATGGAAATTCATCATGACAAACATCATAACACATATGTTACAAAATTAAATTNCAGCAGTTGAAGGGACAGATTTAGAAGCTAAATCAATCGAAGAAATTGTTGCTAATTTAGATAGTGTGCCATCTAATATTCAAACAGCTGTTCGTAATAATGGCGGTGGTCACCTTAACCATTCATTGTTCTGGGAACTATTATCACCAAATTCTGAAGAAAAAGGTGAAGTAGTAGATAAAATTAAAGAACAATGGGGTTCTTTANATGAATTTAAAAAAGAATTTGCATATAAAGCTGCANCACNCTTTGGTTCAGGATGGGCTTGGTTANTTGTAAACNATGGACAATTATAAATTGTTACAACACCAAATCANNATAATCCAATTA…
B1542	Blepharitis/Conjunctivitis	S. epidermidis	94.78	706	CACATNCGACAACAAACTATGGAAATTCATCATGACAACATCATAACNCTATGTTACAAATTAAATTCANCAGTTGAAGGGACAGATTTAGAAGCTAAATCAATCGAAGAAATTGTTGCTAATTTAGATAGTGTGCCATCTAATATTCAAACAGCTGTTCGTAATAATGGCGGTGGTCACCTTAACCATTCATTGTTCTGGGAACTATTATCACCAAATTCNGAANAAAAAGGTGAAGTAGTAGATAAAATTAAAGAACAATGGGGTTCTTTANATGAATTTAAAAAAGAATTTGCANATAAAGCTGCNNCACGCTTTGGTTCAGGATGGGCTTGGTTANTTGTAAACGATGGACTATTATAAATTGTTACAACACCAAATCNNNATAATCCAATTACT…
B1543	Blepharitis/Conjunctivitis	S. epidermidis	96.77	586	NNACATCGACNAACAAACTATGGAAATTCATCATGACAAACATCATAACACATATGTTACAAAATTAAATTCAGCAGTTGAAGGGACAGATTTAGAAGCTAAATCAATCGAAGAAATTGTTGCTAATTTAGATAGTGTGCCATCTAATATTCAAACAGCTGTTCGTAATAATGGCGGTGGTCACCTTAACCATTCATTGTTCNGGGAACTATTATCACCAAATTCNGAANAAAAAGGTGAAGTAGTANATAAAATTAAAGAACAATGGGGTTCTTTANATGAATTTNAAAAANAATTTGCATATAAAGCTGCNTCACGCTTTGGTTCAGGATGGGCTTGGTTACTTNNAANCGNTGAACTANTATANNTTGNTACNNNNNCANANCGTTANNATCNAAT…
B1547	Blepharitis/Conjunctivitis	S. haemolyticus	93.51	586	CCCAACCNTTTNGACNAACNAACNATGGAAATCCNTCNTNGNNNNNNNNNNNNNNNNTTGTTNNCNNNTAANTTNNGNNTTGAGGGAACAGATCTTGAATCTAAATCAATTGAANAAATTGTTGCTAATTTAAATAGTGTACCTGAANATATTCAAACANCTGTTCGTAATAATGGTGGCGGACACTTAAATCACTCATTATTCNGGGAATTATTAACTCCTAATTCNGAANAAAAAGGTACTGTTGTTGATAAAATCAAAGAACAATGGGGCTCTTTANATGAATTCNAAAAAGAATTCNCTGACAAAGCATCANCTCGTTTCGGTTCANGTTGGGCATGGTTANTANTTAACAATGGTCANTTANAAATTGTTACTACACCTAACCNANATAACCCA…
B1554	Blepharitis/Conjunctivitis	S. epidermidis	91.35	470	NNNNNNNNNNNNNNNAANNAANNNNGGNANNTCATNATGACNAACATCATAANNCNTATGTTACNAAATTAAATTCNNCANTTGAAGGGACAGATTTANAGCTAAATCAATCGAANAAATTGTTGCTAATTTANATAGTGTGCCATCTAATATTCAAACAGCTGTTCNTAATAATGGCGGTGGTCACCTTAACCATTCATTGTTCTGGGAACTATTATCACCAAATTCNGAANAAAAAGGTGAANTANNAGATAAAATTAAAGAACAATGGGGTTCTTTANATGAATTTAAAAAANAATTTGCANATAAAGCTGCTNCNCCCTTTGGTTCANGATGGGCTTGNNTANNTNNAANCNATGAACTANTANNANTTGNNNNNNNNNNANNNNNNNANNNNCC…
B1560	Blepharitis/Conjunctivitis	S. epidermidis	94.51	701	ACCACATTCNGACAACAAACNATNGGAAATCCATCATGACAAACATCATAACACATACGCACAAAATAAACCCAGCAGTTCGAAGGGACAGATCAGAAGCTAAATCAATCGAAGAAATCGTTCGCTAATTTAGATAGTGTGCCATCTAATATTCAAACAGCTGTTCGTAATAATGGCGGTGGTCACCTTAACCATTCATTGTTCTGGGAACTATTATCACCAAATTCTGAAGAAAAAGGTGAAGTAGTAGATAAAATTAAAGAACAATGGGGTTCTTTAGATGAATTTAAAAAAGAATTTGCAGATAAAGCTGCANCACGCTTTGGTTCAGGATGGGCTTGGTTANTTGTAAACAATGGACAATTATAAATTGTTACAACACCAAATCAAGATAATCCA…
B1568	Blepharitis/Conjunctivitis	S. epidermidis	88.68	477	AAAANCAACACATNCGACNGNCNNACCNTNGGAAATTCGCATTGACCAGATCTGAAGTCTATGTTATTCAATTGTTCNTGNTTGAAGGGACCGATTTAAAACCTAAATCAATCGAGAAATTGTTGCTAATTTAGATACTGTGCCATCTAATATTCAAACCCCTGTTCNTAATAATGGCGGTGGACACCTTAACCNTTCNTTGTTCAGGGAACTATTATCACCNNNTTCAGAAAAAAAAGGTGAAGTAGTACATAAAATTAAAGAACAATGGGGTTCTTTAAATGAATTTNAAAAACAATTTGCATATAAAGCTGCTTCACCCTTTGGTTCAGGATGGGCTTGGTTACTTGTAAACGATGNACTATTATAAATTGTTACNACACCAAATCNTTATAATCC…
B1637	Blepharitis/Conjunctivitis	S. epidermidis	85.98	477	NAACNAACNATTNCGACNAACAAACTATGGAAATTTNCATCATNGACAAACATCATAACACATANTAGTCTACAAAATTNAAATTNCAGCAGTTCGAAGGGACAGATTTAGAAGCTAAATCAATCGAAGAAATTGTTGCTAATTTAGATAGTGTGCCATCTAATATTCAAACAGCTGTTCGTAATAATGGCGGTGGACACCTTAACCATTCATTGTTCTGGGAACTATTATCACCAAATTCTGAAAAAAAAGGTGAAGTATTAAATAAAATTAAAAAACAATGGGGTTCTTTATATAAANTTNAAAAAAAATTTTCANATAAAACNCCGCCCCNCTTTGTNTCNCGAGATGCGCGTGGTTNTTTGTAAACNGTGNACAAATATAGTTTGTCACCACCCC…
B1651	Blepharitis/Conjunctivitis	S. epidermidis	97.15	743	ACCACCATTTCCGACAACAAACNATGGAAATTCNTCGTGACAACATCATAACACATATGTTNACAAAATAAATTCAGCAGTTGAAGGGACAGATTTAGAAGCTAAATCAATCGAAGAAATNGTTGCTAATTTAGATAGTGTGCCATCTAATATTCAAACAGCTGTTCGTAATAATGGCGGTGGTCACCTTAACCATTCATTGTTCTGGGAACTATTATCACCAAATTCTGAAGAAAAAGGTGAAGTAGTAGATAAAATTAAAGAACAATGGGGTTCTTTAGATGAATTTAAAAAAGAATTTGCAGATAAAGCTGCAGCACGCTTTGGTTCAGGATGGGCTTGGTTAGTTGTAAACAATGGACAATTATAAATTGTTACAACACCAAATCAAGATAATCC…
B1656	Blepharitis/Conjunctivitis	S. epidermidis	88.57	595	AACCACCANCCGACAACNAACNATGGAAATNCTCATGACAACNNCTAACNCTNNGTTACAANTNATTCNNCATTNGAAGGGACAGATTTANAANCTAAATCAATCGAAGAAATNGTTGCTAATTTANATAGTGTGCCATCTAATATTCAAACAGCTGTTCGTAATAATGGCGGTGGACACCTTAACCATTCATTGTTCTGGGAACTATTATCACCAAATTCTGAANAAAAAGGTGAAGTAGTANATAAAATTAAAGAACAATGGGGTTCTTTANATGAATTTAAAAAANAATTTGCANATAAAGCTGCNNCACNCTTTGGTTCAGGATGGGCTTGGTTANTTGTAAACGATGNACNATTATAAATTGTTACNACACCAAATCANNATAATCCAATTACT…
B1677	Blepharitis/Conjunctivitis	S. cohnii	97.96	682	GGNANGTTNGGGAACACGCTACTANATNGTACCGAGCTCGAATTCGTAATCATGGTCANAAGNTAAATTAATGCAGCAATTGAAAGTACTGATTTAGAATCTAAATCAATTGAAGAAATTGTTGCAAATTTAGACAGTGTACCAAAAAATATTCAAACAGCTGTTAGAAATAATGGTGGTGGACACTTAAACCATTCATTATTCTGGGAATTATTAACTCCAAACTCTGAAGAAAAAGGAACTGTAGTTGATAAAATTAAAGAACAATGGGGTTCTTTAGATGCATTTAAAGAAGAATTTGCAGATAAAGCTGCAGCTCGTTTTGGTTCAGGTTGGGCTTGGCTAGTTGTTAATAATGGCAATTTANAAATTGTTACAACTCCAAACCAAGATAACCCA…
B1695	Blepharitis/Conjunctivitis	S. epidermidis	97.97	763	NNNCATCGACAACAAACTATGGAAATTCATCATGACNAACATCATAACACATATGTTACAAAATTAAATTNCAGCAGTTNGAAGGGACAGATTTAGAAGCTAAATCAATCGAAGAAATTCGTTCGCTAATTCTAGATAGTGTGCCATCTAATATTCAAACAGCTGTTCGTAATAATGGCGGTGGTCACCTTAACCATTCATTGTTCTGGGAACTATTATCACCAAATTCTGAAGAAAAAGGTGAAGTAGTAGATAAAATTAAAGAACAATGGGGTTCTTTAGATGAATTTAAAAAAGAATTTGCAGATAAAGCTGCAGCACGCTTTGGTTCAGGATGGGCTTGGTTAGTTGTAAACAATGGACAATTAGAAATTGTTACAACACCAAATCAAGATAATC…
B1725	Blepharitis/Conjunctivitis	S. lugdunensis	95.9	717	NNCAGGCTCNGAATAAAAGAAANCATGGAAATCCTGCTTNGATACACATCTATNATTCGTANGTNACTAAATAAAATTCTGCTGTTGAAAGTACAGACTTAGAGTCTAAATCTATTGAGGAAATTATTGCCAATTTAAATAGCGTTCCTGAAAACATTCAAACAGCTGTACGTAATAATGGTGGCGGACACTTAAACCATTCACTATTCTGGGAATTTTTAACTCCTAATTCTGAAGAAAAAGGTACTGTAGTTGATAAAATTAAAGAACAATGGGGTTCTTTAGATGAATTCAAGAAAGAATTCGCTGACAAAGCTGCAGGTCGTTTTGGTTCAGGTTGGGCATGGTTAGTTGTAAATAACGGTAAATTAGAAATTGTTACAACGCCTAACCAAGACA…
B1739	Blepharitis/Conjunctivitis	S. epidermidis	98.24	791	NCCACATNCGACAACAAACTATGGAAATTTCATCATGACAAACATCATAACACATATGTTACAAAATTAAATTCAGCAGTTGAAGGGACAGATTTAGAAGCTAAATCAATCGAAGAAATCGTTGCTAATTTAGATAGTGTGCCATCTAATATTCAAACAGCTGTTCGTAATAATGGCGGTGGTCACCTTAACCATTCATTGTTCTGGGAACTATTATCACCAAATTCTGAAGAAAAAGGTGAAGTAGTAGATAAAATTAAAGAACAATGGGGTTCTTTAGATGAATTTAAAAAAGAATTTGCAGATAAAGCTGCAGCACGCTTTGGTTCAGGATGGGCTTGGTTAGTTGTAAACAATGGACAATTAGAAATTGTTACAACACCAAATCAAGATAATCCA…
B1767	Blepharitis/Conjunctivitis	S. hominis	97.78	773	CCAATNATNCGACAAGAAACNATNGGAAATTCTCATGACAAACATCATAACACTTATGTTACAAAATTAAATTCTGCAGTTGAAGGTACTGATTTAGAATCTAAATCAATTNGAAGAAATTCGTTGCAAATTTAGATAGTGTACCTGAAAATATTCAAACAGCAGTACGTAATAATGGTGGAGGTCATTTAAATCACTCATTATTCTGGGAATTATTAACTCCTAATTCTGAAGAAAAAGGTACTGTAATTGATAAAATTAAAGAACAATGGGGTTCTTTAGATGAGTTTAAAAAAGAATTCGCTGATAAAGCTGCAGCACGTTTTGGTTCAGGTTGGGCTTGGTTAGTAGTAAATAATGGAAAATTAGAAATTGTTACTACTCCAAATCAAGATAACC…
B1812	Blepharitis/Conjunctivitis	S. epidermidis	88.97	566	TNCGACAACAAACTATGGAAATTCATCATGACNAACATCANAACACNTNAGTTTACTAAATTAAATTNCAGCTNTTGAAGGGACNGATTTAGAATCTAAATCAATCGAAGAAATTGTTGCTAATTTATGATAGTGTGCCATCTAANATTCNAACCTNTGTTCGTAATAATGGTGGTGGTCACCTTAACCATTCATTGTTCTGGGAACTNATAACACCTAATTCTNAAGAAAAAGGTGAAGTANTAGATAAAATTAAANAACAATGGGGTTCTTTAGATGAATTTAAAAAAGAATTTGCTGATNCAGCTGCTGCACGCTTTGGTTCAGGATGGGCTTGGTTANTTGTAAANAATGNANNATTATAAATTGCTTCNACNTCAAATCNNTATAATCCAATTA…
E753	Endophthalmitis	S. epidermidis	90.74	577	AAAACCACANATTGACNAGTTTAATCTATNGCGAAATTCAGCATTGACAAACATCATAACGCATATGTTACAAAATTAAATTCAGCAGTTGAAGGGACAGATTTAGAAGCTAAATCAATCGAAGAAATTGTTGCTAATTTAGATAGTGTGCCATCTAATATTCAAACAGCTGTTCGTAATAATGGCGGTGGTCACCTTAACCATTCATTGTTCTGGGAACTATTATCACCAAATTCAGAANAAAAAGGTGAAGTAGTAGATAAAATTAAAGAACAATGGGGTTCTTTAGATGAATTTAAAAAACAATTTGCATATAAAGCTGCTTCACCCTTTGGTTCAGGATGGGCTTGGNTACCTTTAAACGCTGNAATATTATANATTGTAACAACGCCANAACGT…
E757	Endophthalmitis	S. epidermidis	97.73	760	CCCAGGNTTGCGNACNAAACNAACTATCGGAAATNGATGCATGACAAACATCATAACACATATGTTACAAAATTAAATTCAGCAGTTGAAGAGGACAGATTTAGAAGCTAAATCAATCGAAGAAATTGTTGCTAATTTAGATAGTGTGCCATCTAATATTCAAACAGCTGTTCGTAATAATGGCGGTGGTCACCTTAACCATTCATTGTTCTGGGAACTATTATCACCAAATTCTGAAGAAAAAGGTGAAGTAGTAGATAAAATTAAAGAACAATGGGGTTCTTTAGATGAATTTAAAAAAGAATTTGCAGATAAAGCTGCAGCACGCTTTGGTTCAGGATGGGCTTGGTTAGTTGTAAACAATGGACAATTAGAAATTGTTACAACACCAAATCAAGA…
E759	Endophthalmitis	S. epidermidis	87.56	518	AAAACCCCACATNCGANNAGNTAAACCATGGAAATTCAGCATGACAAAGATCTGAACTCGTAGTTACTCATTTGTTCTNGTTTGAAGGGACCGATTTCAAGCTAAATCAATCGAGAAATTGTTGCTANTTTAGATACTGTGCCATCTAATATTCAAACANCTGTTCGTAATAATGGCGGTGGTCACCTTAACCATTCNTTGTTCNGGGAACTATTATCACCNCNTTCAGAAAAAAAAGGTGAAGTAGTACATAAAATTAAAGAACAATGGGGTTCTTTAAATGAATTTAAAAAACAATTTGCATATAAAGCTGCTTCACCCTTTGGTTCAGGATGGGCTTGGTTACTTGTAAACGATGGACTATTATAAATTGTTACAACNCCAAATCNTNATAATCCA…
E761	Endophthalmitis	S. epidermidis	87.84	459	AAANCCCCACAATNNGACNAGTTTAATCCCTNGGAAATTCAGCATTGACAAAGATCAGAACTNGTTCTTAGTCNATNTGTTCTTGTTTGAAGGGACCGATTTCGAANCTGAATCAATCGTGAAATTGTTGCTAATTTAGATAGTGTGCCATCTAATATTCAAACCCCTGTTCTTAATAATGGCGGTGGTCACCTTAACCNTTCTNTGTTCAGGNAACTATTATCACCTNNTTCAGAAAAAAAAGGTGAAGTAGACCANAAAATTAAAGAACAATGGGGTTCTTTAGATGAATTTAAAAAACAATTTGCATATAAAGCTGCTTCACCCTTTGGTTCAGGATGGGCTTGGTTACTTGTAANCGNTGAACNATTATAAATTGTTACAACACCANATCNTTAT…
E762	Endophthalmitis	S. epidermidis	92.26	638	CCANCANNCCGANCAACNAACNANGGAAAACAGCANGAAAACANCAAACACAGAAGAACAAAAAAACCCAGCAGTTGAAGGGACAGATTAGAAGCTAAATCAATCGAAGAAATNGTTTGCTAATTTAGATAGTGTTGCCATCTAATATTCAAACAGCTGTTCGTAATAATGGCGGTGGTCACCTTAACCATTCATTGTTCTGGGAACTATTATCACCAAATTCTGAAGAAAAAGGTGAAGTAGTAGATAAAATTAAAGAACAATGGGGTTCTTTAGATGAATTTAAAAAAGAATTTGCANATAAAGCTGCATCACGCTTTGGTTCAGGATGGGCTTGGTTANTTGTAAACNATGGACAATTATAAATTGTTACAACACCAAATCANNATAATCCAATTA…
E767	Endophthalmitis	S. epidermidis	91.18	636	ACNANCANNCGACNAACNAACTATGGAAATCANCATGACAAACANCAAACACATACGAACAAAANAAANCAGCAGTTGAAGGGACAGATTAGAAGCTAAATCAATCGAAGAAATTGTTGCTAATTTAGATAGTGTGCCATCTAATATTCAAACAGCTGTTCGTAATAATGGCGGTGGTCACCTTAACCATTCATTGTTCTGGGAACTATTATCACCAAATTCTGAANAAAAAGGTGAAGTAGTANATAAAATTAAAGAACAATGGGGTTCTTTANATGAATTTAAAAAANAATTTGCATATAAAGCTGCNTCACCCTTTGGTTCAGGATGGGCTTGGTTANTTGTAAACNATGNACNATTATAAATTGTTACAACANCAAATCNTTATAATCCAATTAC…
E769	Endophthalmitis	S. epidermidis	87.89	540	AACAACANNCNGAACAACAAACAAGGGAAANCAGCANGAAAACANCATAACACANACGNACAAANAAATCAGCAGTTGAAGGGACAGATTTAGAAGCTAAATCAATCGAAGAAATTGTTGCTAATTTAGATAGTGTGCCATCTAATATTCAAACAGCTGTTCGTAATAATGGCGGTGGTCACCTTAACCATTCATTGTTCTGGGAACTATTATCACCAAATTCTGAAGAAAAAGGTGAAGTAGTANATAAAATTAAAGAACAATGGGGTTCTTTANATGAATTTAAAAAANAATTTGCANATAAANCTGCNTCACCCTTTGGTTCAGGATGGGCTTGGTTACTTTTAAACGCTGGACNNTTNTNTATTGTTTCAACGCCANANCNTTATNNTCCAATTA…
E771	Endophthalmitis	S. epidermidis	91.12	603	CCNACATNCCGANCAAACAAACNANGGAAANNAGCANGAAAACANCAAACACAGANGAANAAAAAAACCAGCAGTNGAAGGGACAGATTAGAAGCTAAATCAATCGAAGAAATTTGTTGCTAATTTAGATAGTGTGCCATCTAATATTCAAACAGCTGTTCGTAATAATGGCGGTGGTCACCTTAACCATTCATTGTTCTGGGAACTATTATCACCAAATTCTGAAGAAAAAGGTGAAGTAGTANATAAAATTAAAGAACAATGGGGTTCTTTANATGAATTTAAAAAAGAATTTGCATATAAAGCTGCNTCACNCTTTGGTTCAGGATGGGCTTGGTTACTTGTAAACNATGGACNATTATAAATTGTTACAACACCANATCATTATAATCCAATTAC…
E782	Endophthalmitis	S. epidermidis	92.36	652	ACCACATNCCGACNAACAAACNATGGAAATNCATCATGACNAACATCATAACACATATGTTACAAAATTAAATTCAGCAGTTCAAGGGACAGATTTAGAAGCTAAATCAATCGAAGAAATTGTTGCTAATTTAGATAGTGTGCCATCTAATATTCAAACAGCTGTTCGTAATAATGGCGGTGGTCACCTTAACCATTCATTGTTCTGGGAACTATTATCACCAAATTCNGAAGAAAAAGGTGAAGTAGTAGATAAAATTAAAGAACAATGGGGTTCTTTANATGAATTTAAAAAANAATTTGCATATAAAGCTGCTTCACNCTTTGGTTCAGGATGGGCTTGGTTACTTNTAAACGATGNACTANTATAAATTGTTACAACNCCANATCNTTATAATCC…
E784	Endophthalmitis	S. epidermidis	98.59	756	NNNNNNNNNNNNNNNNNNNNNNGGAAATTCATCATGACAAACATCATAACACATATGTTACAAAATTAAATTCAGCAGTTGAAGGGACAGATTTAGAAGCTAAATCAATCGAAGAAATTGTTGCTAATTTAGATAGTGTGCCATCTAATATTCAAACAGCTGTTCGTAATAATGGCGGTGGTCACCTTAACCATTCATTGTTCTGGGAACTATTATCACCAAATTCTGAAGAAAAAGGTGAAGTAGTAGATAAAATTAAAGAACAATGGGGTTCTTTAGATGAATTTAAAAAAGAATTTGCAGATAAAGCTGCAGCACGCTTTGGTTCAGGATGGGCTTGGTTAGTTGTAAACGATGGACAATTATAAATTGTTACAACACCAAATCAAGATAATCCAA…
E785	Endophthalmitis	S. epidermidis	91.42	638	CCNACATNACCGACCAACNAACNANGGAAAANAGCANGACAAACANCANAACAAGAAGANACAAAANAAACCCAGCAGNNGAAGGGACAGATNAGAAGCTAAATCAATCGAAGAAATCGTTNGCTAATTNAGATAGTGTGCCATCTAATATTCAAACAGCTGTTCGTAATAATGGCGGTGGTCACCTTAACCATTCATTGTTCTGGGAACTATTATCACCAAATTCTGAAGAAAAAGGTGAAGTAGTAGATAAAATTAAAGAACAATGGGGTTCTTTAGATGAATTTAAAAAAGAATTTGCANATAAAGCTGCATCACGCTTTGGTTCAGGATGGGCTTGGTTANTTGTAAACAATGGACAATTATAAATTGTTACAACACCAAATCANNATAATCCAA…
E786	Endophthalmitis	S. epidermidis	92.78	665	CCNACCATNCCCGACNAACNAACNANGGAAAACAGCATGACAAACAACANAACACAGAAGANACAAAAAAACNCAGCAGTTGAAGGGACAGATNTAGAAGCTAAATCAATCGAAGAAATTTGTTGCTAATTTAGATAGTGTGCCATCTAATATTCAAACAGCTGTTCGTAATAATGGCGGTGGTCACCTTAACCATTCATTGTTCTGGGAACTATTATCACCAAATTCTGAAGAAAAAGGTGAAGTAGTAGATAAAATTAAAGAACAATGGGGTTCTTTANATGAATTTAAAAAAGAATTTGCANATAAAGCTGCANCACGCTTTGGTTCAGGATGGGCTTGGTTANTTGTAAACAATGGACAATTATAAATTGTTACAACACCAAATCANNATAATCC…
E787	Endophthalmitis	S. epidermidis	96.66	750	CCACATTCCGACNAACAAACNATGGAAATCANCATGACAAACATCATAACACATATGNACAAAATAAATTTCAGCAGTTGAAGGGACAGATTTAGAAGCTAAATCAATCGAAGAAATTGTTGCTAATTTAGATAGTGTGCCATCTAATATTCAAACAGCTGTTCGTAATAATGGCGGTGGTCACCTTAACCATTCATTGTTCTGGGAACTATTATCACCAAATTCTGAAGAAAAAGGTGAAGTAGTAGATAAAATTAAAGAACAATGGGGTTCTTTAGATGAATTTAAAAAAGAATTTGCAGATAAAGCTGCAGCACGCTTTGGTTCAGGATGGGCTTGGTTAGTTGTAAACAATGGACAATTATAAATTGTTACAACACCAAATCAAGATAATCCAAT…
E790	Endophthalmitis	S. epidermidis	96.52	630	ACNACANACNGAACNAAGAAAAGANGGGAAANCAGANGGAAAAAAGNCAAACACANANGNACAAAAAAAATCAGCAGTTGAAGGGACAGATTTAGAAGCTAAATCAATCGAAGAAATTGTTGCTAATTTAGATAGTGTGCCATCTAATATTCAAACAGCTGTTCGTAATAATGGCGGTGGTCACCTTAACCATTCATTGTTCTGGGAACTATTATCACCAAATTCTGAAGAAAAAGGTGAAGTAGTAGATAAAATTAAAGAACAATGGGGTTCTTTAGATGAATTTAAAAAAGAATTTGCANATAAAGCTGCATCACCCTTTGGTTCAGGATGGGCTTGGTTANTTGTAAACNATGGACAATTATAAATTGTTACAACNCCAAATCANGATAATCCAAT…
E791	Endophthalmitis	S. epidermidis	96.03	699	CCNANCANACNGACNAAANNAACGANAGGAAANNCANCATGAAAACAGNCAAACACATANGAACAAAAAAAATCAGCAGTTGAAGGGACAGATTTAGAAGCTAAATCAATCGAAGAAATTGTTGCTAATTTAGATAGTGTGCCATCTAATATTCAAACAGCTGTTCGTAATAATGGCGGTGGTCACCTTAACCATTCATTGTTCTGGGAACTATTATCACCAAATTCTGAAGAAAAAGGTGAAGTAGTAGATAAAATTAAAGAACAATGGGGTTCTTTAGATGAATTTAAAAAAGAATTTGCAGATAAAGCTGCAGCACGCTTTGGTTCAGGATGGGCTTGGTTAGTTGTAAACAATGGACAATTAGAAATTGTTACAACACCAAATCAAGATAATCCA…
E792	Endophthalmitis	S. epidermidis	96.92	658	ACNANCANNCNGACAAACNAANNANGGAAAANAGNANGAAAACAGACAAAGACAGAAGAACAAAAAAAANCAGCAGNTGAAGGGACAGATNAGAAGCTAAATCAATCGAAGAAATTGTTGCTAATTTAGATAGTGTGCCATCTAATATTCAAACAGCTGTTCGTAATAATGGCGGTGGTCACCTTAACCATTCATTGTTCTGGGAACTATTATCACCAAATTCTGAAGAAAAAGGTGAAGTAGTAGATAAAATTAAAGAACAATGGGGTTCTTTAGATGAATTTAAAAAAGAATTTGCAGATAAAGCTGCAGCACGCTTTGGTTCAGGATGGGCTTGGTTAGTTGTAAACAATGGACAATTANAAATTGTTACAACACCAAATCAAGATAATCCAATTA…
E794	Endophthalmitis	S. epidermidis	97.97	516	NNGGGGGNNGNGNNGGNNGGGGGGANGGAAAGGANGANGGNAAANGTAGNNNNNGNANNAAGGGAAAAANTTNATCATGNCATAAGGATATCTTTAACNTTTGGATCACGCNNTTTGTTGTTCCTTTCTCTANTTNGNCATCTTGGTNATAAACCGCTGTTCGTAATAATGGCGGTGGTCACCTTAACCATTCATTGTTCTGGGAACTATTATCACCAAATTCTGAAGAAAAAGGTGAAGTAGTAGATAAAATTAAAGAACAATGGGGTTCTTTAGATGAATTTAAAAAAGAATTTGCAGATAAAGCTGCAGCACGCTTTGGTTCAGGATGGGCTTGGTTAGTTGTAAACAATGGACAATTANAAATTGTTACAACACCAAATCAAGATAATCCAATTA…
E796	Endophthalmitis	S. epidermidis	91.18	627	CCACATCGACAACAAACTATGGAAATTCATCATGACAAACATCATAACACATATGTACAAAATTAAATNCAGCAGTCGAAGGGACAGATTCAGAAGCTAAATCAATCGAAGAAATCGTTNGCTAATTTAGATAGTGTTGCCATCTAATATTCAAACAGCNGTTCGTAATAATGGCGGTGGTCACCTTAACCATTCATTGTTCTGGGAACTATTATCACCAAATTCTGAANAAAAAGGTGAAGTAGTACATAAAATTAAAGAACAATGGGGTTCTTTANATGAATTTAAAAAANAATTTGCATATAAAGCTGCTTCACCCTTTGGTTCAGGATGGGCTTGGTTACTTGTAANCGNTGNACTATTATANATTGTTACNACANCANATCNTTATAATCCAAT…
E797	Endophthalmitis	S. epidermidis	93.67	695	AAAACNANCGANAANCGACNAACNAACCATGGAAATTCNTCATGACAAACACCATAACACNTATGTTACNAAATTAAATTCANCAGTTGAAGGGACAGATTTAGAAGCTAAATCAATCGAAGAAATTGTTGCTAATTTAGATAGTGTGCCATCTAATATTCAAACAGCTGTTCGTAATAATGGCGGTGGACACCTTAACCATTCATTGTTCTGGGAACTATTATCACCAAATTCTGAAGAAAAAGGTGAAGTTGTANATAAAATAAAAGAACAATGGGGTTCTTTAAACGAATTTAAAAAAGAATTTGCANATAAAGCTGCNTCACGCTTTGGTTCAGGATGGGCTTGGTTANTTGNAAACGATGAACAATTATAAATTGTTACNNCNCCAANTCNNNA…
E798	Endophthalmitis	S. epidermidis	96.15	737	NCCNACATNCCGACAACAAACNATGGAAATNCTCATGACAAACATCATAACACATATGTTACAAAATTAAATTCAGCAGTTGAAGGGACAGATTTAGAAGCTAAATCAATCGAAGAAATTGTTGCTAATTTAGATAGTGTGCCATCTAATATTCAAACAGCTGTTCGTAATAATGGCGGTGGTCACCTTAACCATTCATTGTTCTGGGAACTATTATCACCAAATTCTGAAGAAAAAGGTGAAGTAGTAGATAAAATTAAAGAACAATGGGGTTCTTTAGATGAATTTAAAAAAGAATTTGCANATAAAGCTGCATCACGCTTTGGTTCAGGATGGGCTTGGTTANTTGTAAACNATGNACAATTATAAATTGTTACAACACCAAATCANNATAATCCA…
E801	Endophthalmitis	S. epidermidis	94.57	436	TNAANNCACCCGGCGNGNNGACANAAACGANGGGAAACCAGNCANGGACAAACANNCATAACACATNACGTTNACACAANCAAATTCAGCAGTTGAAGGGACAGATTTAGAAGCTAAATCAATCGAAGAAATTGTTGCTAATTTANATAGTGTGCCATCTAATATTCAAACAGCTGTTCGTAATAATGGCGGTGGTCACCTTAACCATTCATTGTTCTGGGAACTATTATCACCAAATTCTGAAAAAAAAGGTGAAGTAGTAGATAAAATTAAAGAACAATGGGGTTCTTTATATGAANTTAAAAAANAATTTNCANATAAACCTCCNCCNCCCNCTGGTTCACGANNNGCNCGTGNNNCTTTGTACGCTGGGGATAAATATATANTGTCACCACCCCA…
E803	Endophthalmitis	S. epidermidis	88.15	551	AAACACCNNGAGCGAANAACAAACAAGGGAAACCAGCAGGAAAACACAAACACATACGNACAAAAAAACCAGCAGTCGAAGGGAAGATTAGAAGCTAAATCAATCGAAGAAATTTGTTTGCTAATTTAGATAGTGTGCCATCTAATATTCAAACAGCTGTTCGTAATAATGGCGGTGGTCACCTTAACCATTCATTGTTCTGGGAATTATTATCACCAAATTCTGAANAAAAAGGTGAAGTAGTANATAAAATTAAAGAACAATGGGGTTCTTTANATGAATTTAAAAAANAATTTGCATATAAAGCTGCNTCACNCTTTGGTTCAGGATGGGCTTGGTTACTTNTAAACGATGNACTATTATAAATTGTTACNACNCCANATCNTTATAATCCAATTA…
E804	Endophthalmitis	S. hominis	90.86	525	AAANANGAAAAANCGNAAANAGAAAACANGGGAAAACAGCANGACAACACAGAAACTACGCAAAAAAAAACCCNGCATTNGAAGGTACCGATTAGAATCTAAATCAATNGAAGAAATCGTTTGCAAATTTAGATAGTGTACCTGAAAATATTCAAACAGCAGTACGTAATAATGGTGGAGGTCATTTAAATCACTCATTATTCTGGGAATTATTAACTCCTAATTCTGAAGAAAAAGGTACTGTAATTGATAAAATTAAAGAACAATGGGGTTCTTTANATGATTTTAAAAAANAATTCGCTGATAAAGCTGCNGCACGTTTTGGTTCAAGTTGGGCTTGGTTACTACTAAATAATGGANAATTTTAAATTGTTACTNCTCCTAATCNTTATAACCCCN…
E807	Endophthalmitis	S. lugdunensis	96.54	719	ACCNANNANATGAAAANNGAAAACAACGGGAAAACCANCANGGAAACANCATAATACGTACGCGANAAATAAATTCTGCAGTTGAAGGTACAGACTTAGAGTCTAAATCTATTGAGGAAATTATTGCCAATTTAGATAGCGTTCCTGAAAACATTCAAACAGCTGTACGTAATAATGGTGGTGGACACTTAAACCATTCACTATTCTGGGAATTTTTAACTCCTAATTCTGAAGAAAAAGGTACTGTAGTTGATAAAATTAAAGAACAATGGGGTTCTTTAGATGAATTCAAGAAAGAATTCGCTGACAAAGCTGCAGGTCGTTTTGGTTCAGGTTGGGCATGGTTAGTTGTAAATAACGGTAAATTAGAAATTGTTACAACGCCTAACCAAGACAACC…
E810	Endophthalmitis	S. epidermidis	91.74	621	NTTAAACACCNGGNGGGAAGGACAAACNANGGAAAGCAGCANGAAAAGACATAACACAGACGAAAAAAAAAGTCCAGCAGTTGAAGGGACGATTAGAAGCTAAATCAATCGAAGAAATTGTTGCTAATTTAGATAGTGTGCCATCTAATATTCAAACAGCTGTTCGTAATAATGGCGGTGGTCACCTTAACCATTCATTGTTCTGGGAACTATTATCACCAAATTCTGAAGAAAAAGGTGAAGTAGTANATAAAATTAAAGAACAATGGGGTTCTTTAGATGAATTTAAAAAAGAATTTGCANATAAAGCTGCNTCACCCTTTGGTTCAGGATGGGCTTGGTTANTTGTAAACNATGNACNATTATAAATTGTTACAACACCAAATCANNATAATCCAA…
E811	Endophthalmitis	S. epidermidis	94.4	593	AAAACCAACCGNAGNGAANAACAAACNANGGAAAACAGCANGACAAANACAGAANCAGACGNACAAAAAANNNCGCAGTTGAAGGGACAGATTTAGAAGCTAAATCATCGAAGAAATTGTTGCTAATTTAGATAGTGTGCCATCTAATATTCAAACAGCTGTTCGTAATAATGGCGGTGGTCACCTTAACCATTCATTGTTCTGGGAACTATTATCACCAAATTCTGAAGAAAAAGGTGAAGTAGTANATAAAATTAAAGAACAATGGGGTTCTTTAGATGAATTTAAAAAANAATTTGCATATAAAGCTGCNTCACCCTTTGGTTCAGGATGGGCTTGGTTACTTGTAAACNATGNACNATTATAAATTGTTACAACNCCAAATCANTATAATCCAAT…
E814	Endophthalmitis	S. lugdunensis	94.57	584	ANCATNATNTNGATNNAGAAACNATNGGAAATCCATCATGATAAACATCATAATACGTATGTGACTAAATTAAATTACTGCAGTTGAAGGTACAGACTTAGAGTCTAAATCTATTCGAGGAAATTATTNGCCAATTTAGATAGCGTTCCTGAAAACATTCAAACAGCTGTACGTAATAATGGTGGTGGACACTTAAACCATTCACTATTCTGGGAATTTTTAACTCCTAATTCTGAANAAAAAGGTACTGTAGTTGATAAAATTAAAGAACAATGGGGTTCTTTANATGAATTCAAGAAAGAATTCNCTGACAAANCTGCACGTCGTTTTGGTTCANGTTGGGCNTGGTTACTTGTAANNAACAGTTNATTATAATTTGTTACATCTNCTAATCTTTAC…
E816	Endophthalmitis	S. epidermidis	95.93	730	NCCNACNATNNCNGACNAACNAACTATNGGAAATTCATCATGACNAACATCATAACACATATGTTACAAAATTAAATTCACAGTTGAAGGGACAGATTTAAAGCTAAATCAATCGAAGAAATTGTTGCTAATTTAATAGTGTGCCATCTAATATTCAAACAGCTGTTCGTAATAATGGCGGTGGTCACCTTAACCATTCATTGTTCTGGGAACTATTATCACCAAATTCTGAANAAAAAGGTGAAGTAGTAGATAAAATTAAAGAACAATGGGGTTCTTTANATGAATTTAAAAAAGAATTTGCANATAAAGCTGCANCACGCTTTGGTTCAGGATGGGCTTGGTTANTTGTAAACNATGGACAATTATAAATTGTTACAACACCAAATCAAGATAATC…
E817	Endophthalmitis	S. lugdunensis	92.51	265	NNNNNNNNNNNNCCNCNAGCGGNCCGCANAANNGATGTCGCNANGNGNTCNGGTATCTCTAATCGAACAATACATCAATATATTACCATTGAATACTTTAGCGGGATTGTCAAACCGCATTTAACTTTCCTCATCATAATCACCTATTTTAATTTCAAGTTACTGTTTGTGATTTCCTGTTCTACTTTATCTCTGTATTTGTGCGGCAATCTGTTTTTAACTGCAAATATAAGTGACGTTGGGAACACNCTACTANATGTACCGAGCTCNAATTCNTAATCATGGTCATAANGGTTCTTTANATGAATTCNANAAANATTCACTGACCAAACTGCCCGTCNGNTTTNNTTCAGGNTGNGNNGGGTTCNTTNTNNGGAAGCGGNAAGTGGAAGTTGGNGC…
E820	Endophthalmitis	S. epidermidis	96.54	717	ATANGGGANAATTCATCATNGACAAACATCATGAACACATATGTTACAAAATTNAAATTNCAGCAGTTAGAAGGGACAGATTTAGAAGCTAAATCAATCGAAGAAATTCGTTGCTAATTTAGATAGTGTGCCATCTAATATTCAAACAGCTGTTCGTAATAATGGCGGTGGTCACCTTAACCATTCATTGTTCTGGGAACTATTATCACCAAATTCTGAAGAAAAAGGTGAAGTAGTAGATAAAATTAAAGAACAATGGGGTTCTTTAGATGAATTTAAAAAAGAATTTGCAGATAAAGCTGCANCACGCTTTGGTTCAGGATGGGCTTGGTTAGTTGTAAACGATGGACAATTATAAATTGTTACAACACCAAATCAAGATAATCCAATTACTGAAGG…
E822	Endophthalmitis	S. epidermidis	95.71	529	NCACATNCGACAACAAACTATGGAAATTCATCATGACAAACATCATAACACATATGTTACAAAATTAAATTCAGCAGTTGAAGGGACAGATTTAGAAGCTAAATCAATCGAAGAAATTGTTGCTAATTTAGATAGTGTGCCATCTAATATTCAAACAGCTGTTCGTAATAATGGCGGTGGACACCTTAACCATTCATTGTTCTGGGAACTATTATCACCAAATTCAGAAAAAAAAGGTGAAGTAGTANATAAAATTAAAGAACAATGGGGTTCTTTAGATGAATTTANAAAACAATTTGCATANAAAACTGCTTCTCCATTTGGTTTACGANGNGCGTNTGTCCCTTCAANNGCTGAAGATANTTNTATANTNNAAGCGNNCTAAAGANAGACNCCNCA…
E823	Endophthalmitis	S. epidermidis	97.77	774	NCACATGCGACAATCAAACTATGGAAATTCATCATGACAAACATCATAACACATATGTTACAAAATTAAATTCAGCAGTTGAAGGGACAGATTTAAAGCTAAATCAATCGAAGAAATTGTTGCTAATTTAGATAGTGTGCCATCTAATATTCAAACAGCTGTTCGTAATAATGGCGGTGGTCACCTTAACCATTCATTGTTCTGGGAACTATTATCACCAAATTCTGAANAAAAAGGTGAAGTAGTAGATAAAATTAAAGAACAATGGGGTTCTTTAGATGAATTTAAAAAAGAATTTGCAGATAAAGCTGCANCACGCTTTGGTTCAGGATGGGCTTGGTTAGTTGTAAACAATGGACAATTATAAATTGTTACAACACCAAATCAAGATAATCCAAT…
E825	Endophthalmitis	S. epidermidis	92.98	510	ACNAACATNCNGACAACAAACTATGGAAATTCATCATGACAAACATCATAACACATATGTTACAAAATTAAATTCAGCAGTTGAAGGGACAGATTTAAAGCTAAATCAATCGAAGAAATTGTTGCTAATTTAGATAGTGTGCCATCTAATATTCAAACAGCTGTTCGTAATAATGGCGGTGGTCACCTTAACCATTCATTGTTCNGGGAACTATTATCACCAAATTCNGAAAAAAAAGGTGAAGTAGACATAAAATTAAANAACAATGGGGTTCTTTAAATGAATTTAAAAAACAATTTNCATANAAAACTGCTTCNCCCTTTGGTTCAGNNTNGGCTTCGGTCCCTTCAACAGCTGGAGTAAATTTANTAANTTCTACGCCANNATGTNATTATCCCC…
E826	Endophthalmitis	S. epidermidis	96.62	643	CCNANGNTNGCCAAGCTTAGCATNGCGNGGCAGGNCGCCTGACNAAGNCGTAACCCGTTGTTACNCATTAAGTTCACCACTTGAANGGACCATTTAGAAGCTAAAACAATCGAAGAAATTGTTGCTAATTTAGATAGTGTGCCATCTAATATTCAAACAGCTGTTCGTAATAATGGCGGTGGTCACCTTAACCATTCATTGTTCTGGGAACTATTATCACCAAATTCTGAAGAAAAAGGTGAAGTAGTAGATAAAATTAAAGAACAATGGGGTTCTTTAGATGAATTTAAAAAAGAATTTGCAGATAAAGCTGCANCACGCTTTGGTTCAGGATGGGCTTGGTTAGTTGTAAACAATGGACAATTATAAATTGTTACAACACCAAATCAAGATAATCCA…
E827	Endophthalmitis	S. epidermidis	95.96	726	ACACATTCCGCCAACAAACTATGGAAATTCTCATGACAAACANCNAACACNANGTACAAAATAAATTCAGCAGTTGAAGGGACAGATTTAGAAGCTAAATCAATCGAAGAAATCGTTNGCTAATTTAGATAGTGTGCCATCTAATATTCAAACAGCTGTTCGTAATAATGGCGGTGGTCACCTTAACCATTCATTNGTTCTGGGAATTATTATCACCAAATTCTGAAGAAAAAGGTGAAGTAGTAGATAAAATTAAAGAACAATGGGGTTCTTTAGATGAATTTAAAAAAGAATTTGCAGATAAAGCTGCAGCACGCTTTGGTTCAGGATGGGCTTGGTTAGTTGTAAACAATGGACAATTAGAAATTGTTACAACACCAAATCAAGATAATCCAATTA…
E831	Endophthalmitis	S. epidermidis	92.94	483	NNNNNACACATCGACNAACAAACTATGGAAATTCATCATGACAAACATCATAACACATATGTTACAAAATTAAATTCAGCAGTTGAAGGGACAGATTTAAAGCTAAATCAATCGAAGAAATTGTTGCTAATTTAGATAGTGTGCCATCTAATATTCAAACAGCTGTTCGTAATAATGGCGGTGGTCACCTTAACCATTCTTTGTTCNGGGAACTATTATCACCNCNCTCAGAAAAAAAAGGTGAAGTAGTACATAAAATTAAAAAACAATGGGGTTCTTTAAATAAATTTAAAAAACAATTTTCANATAAAACCCCTTCACCCTTTGGTTTTCGANGTGCGTNTGTTTCTTTANACGGNGGGANAATTTATATATTGNNCCCACCCCNCAAANNNATNN…
E836	Endophthalmitis	S. epidermidis	97.96	763	NNNNNNNNNNAAACTATGGAAATTCATCATGACAAACATCATAACACATATGTTACAAAATAAATTNCAGCAGTTGAAGGGACAGATTTAGAAGCTAAATCAATCGAAGAAATTGTTTGCTAATTTAGATAGTGTGCCATCTAATATTCAAACAGCTGTTCGTAATAATGGCGGTGGTCACCTTAACCATTCATTGTTCTGGGAACTATTATCACCAAATTCTGAAGAAAAAGGTGAAGTAGTAGATAAAATTAAAGAACAATGGGGTTCTTTAGATGAATTTAAAAAAGAATTTGCAGATAAAGCTGCAGCACGCTTTGGTTCAGGATGGGCTTGGTTAGTTGTAAACAATGGACAATTATAAATTGTTACAACACCAAATCAAGATAATCCAATTAC…
E839	Endophthalmitis	S. epidermidis	93.24	688	NCAACANTCCGACNAAACNAACTATGGNAATTCATCATNGACNAACATCNTAACACATATGTTACAAAATTAAATTCANCAGTTGAAGGGACAGATTTAAAGCTAAATCAATCGAAGAAATTGTTGCTAATTTANATAGTGTGCCATCTAATATTCAAACAGCTGTTCGTAATAATGGCGGTGGTCACCTTAACCATTCATTGTTCTGGGAACTATTATCACCAAATTCNGAANAAAAAGGTGAAGTAGNANATAAAATTAAAGAACAATGGGGTTCTTTANATGAATTTAAAAAAGAATTTGCANATAAAGCTGCNTCACNCTTTGGTTCAGGATGGGCTTGGTTACTTGTAAACGATGNACNATTATAAATTGTTACAACACCAAANCAANATAATC…
E840	Endophthalmitis	S. epidermidis	95.21	701	NNNNCCACATCCGNACACCTAACTATGGAAATTCATCATGACNAACATCTAACACTATGTTACAAAATTAAATTCACAGTTGAAGGGACAGATTTAAACTAAATCAATCGAAGAAATTGTTGCTAATTTAATAGTGTGCCATCTAATATTCAAACAGCTGTTCGTAATAATGGCGGTGGACACCTTAACCATTCATTGTTCTGGGAACTATTATCACCAAATTCTGAAAAAAAAGGTGAAGTAGTAGATAAAATTAAAGAACAATGGGGTTCTTTAGATGAATTTAAAAAAGAATTTGCANATAAAGCTGCANCACGCTTTGGTTCAGGATGGGCTTGGTTACTTGNAAACGATGGACAATTATAAATTGTTACNACACCAAATCAAGATAATCCAATT…
E844	Endophthalmitis	S. epidermidis	96.93	761	NNACATNCGACAACAAACTATGGAAATTCATCATGACAAACATCATAACACATATGTTACAAAATTAAATTNCAGCAGTTAGAAGGGACAGATTTAGAAGCTAAATCAATCGAAGAAATTNGTTNGCTAATTTAGATAGTGTGCCATCTAATATTCAAACAGCTGTTCGTAATAATGGCGGTGGTCACCTTAACCATTCATTGTTCTGGGAACTATTATCACCAAATTCTGAANAAAAAGGTGAAGTAGTAGATAAAATTAAAGAACAATGGGGTTCTTTAGATGAATTTAAAAAAGAATTTGCAGATAAAGCTGCANCACGCTTTGGTTCAGGATGGGCTTGGTTAGTTGTAAACAATGGACAATTATAAATTGTTACAACACCAAATCAAGATAATC…
E847	Endophthalmitis	S. epidermidis	93	675	NCCNANCNNTNCGNACNAAACTAANCTATGGNNATTCNTNCATNGACNAACATCNTGAACNCNTNTNGTTACNAATTAAATTCANCAGTTGAAGGGACAGATTTAGAAGCTAAATCAATCGAAGAAATTGTTGCTAATTTAGATAGTGTGCCATCTAATATTCAAACAGCTGTTCGTAATAATGGCGGTGGNCACCTTAACCATTCATTGTTCTGGGAACTATTATCACCAAATTCTGAAAAAAAAGGTGAAGTAGTAGATAAAATTAAAGAACAATGGGGTTCTTTAAATGAATTTAAAAAAGAATTTGCANATAAAGCTGCNNCACNCTTTGGTTCAGGATGGGCTTGGTTANTTGTAAACNATGGACAATTATAAATTGTTACAACACCAAATCAA…
E848	Endophthalmitis	S. epidermidis	98.2	784	CCANCATCGACNAACNAACTATGGAAATTCATCATGACAAACATCATAACACATATGTTACAAAATTAAATTCAGCAGTTGAAGGGACAGATTTAGAAGCTAAATCAATCGAAGAAATTGTTGCTAATTTAGATAGTGTGCCATCTAATATTCAAACAGCTGTTCGTAATAATGGCGGTGGTCACCTTAACCATTCATTGTTCTGGGAACTATTATCACCAAATTCTGAAGAAAAAGGTGAAGTAGTAGATAAAATTAAAGAACAATGGGGTTCTTTAGATGAATTTAAAAAAGAATTTGCAGATAAAGCTGCAGCACGCTTTGGTTCAGGATGGGCTTGGTTAGTTGTAAACNATGGACAATTATAAATTGTTACAACACCAAATCAAGATAATCCAA…
E852	Endophthalmitis	S. epidermidis	95.74	734	CCANCATNCGACNAACTAACTATGGAAATTCATCATGACAAACATCATAACACATATGTTACAAAATTAAATTCAGCAGTTGAAGGGACAGATTTAAACTAAATCAATCGAAGAAATTGTTGCTAATTTAGATAGTGTGCCATCTAATATTCAAACAGCTGTTCGTAATAATGGCGGTGGTCACCTTAACCATTCATTGTTCTGGGAACTATTATCACCAAATTCNGAAGAAAAAGGTGAAGTAGTAGATAAAATTAAAGAACAATGGGGTTCTTTAGATGAATTTAAAAAAGAATTTGCANATAAAGCTGCNTCACGCTTTGGTTCAGGATGGGCTTGGTTANTTGTAAACNATGNACAATTATAAATTGTTACAACACCAAANCAANATAATCCAAT…
E853	Endophthalmitis	S. epidermidis	98.17	765	NNNNNTCGACAACAAACTATGGAAATTCATCATGACAAACATCATAACACATATGTTACAAAATTAAATTCAGCAGTTTGAAGGGACAGATTTAGAAGCTAAATCAATCGAAGAAATNGTTGCTAATTTAGATAGTGTGCCATCTAATATTCAAACAGCTGTTCGTAATAATGGCGGTGGTCACCTTAACCATTCATTGTTCTGGGAACTATTATCACCAAATTCTGAAGAAAAAGGTGAAGTAGTAGATAAAATTAAAGAACAATGGGGTTCTTTAGATGAATTTAAAAAAGAATTTGCAGATAAAGCTGCANCACGCTTTGGTTCAGGATGGGCTTGGTTAGTTGTAAACNATGGACAATTATAAATTGTTACAACACCAAATCAAGATAATCCAAT…
E855	Endophthalmitis	S. epidermidis	95.58	728	CNACATNCGACAACAAACTATGGAAATTCTCATGACAACATCTAACACTATGTTACAAATTAAATTCAGCAGTTGAAGGGACAGATTTAAAGCTAAATCAATCGAAGAAATTGTTGCTAATTTAGATAGTGTGCCATCTAATATTCAAACAGCTGTTCGTAATAATGGCGGTGGTCACCTTAACCATTCATTGTTCTGGGAACTATTATCACCAAATTCNGAANAAAAAGGTGAAGTAGTANATAAAATTAAAGAACAATGGGGTTCTTTANATGAATTTAAAAAAGAATTTGCAGATAAAGCTGCANCACGCTTTGGTTCAGGATGGGCTTGGTTAGTTGTAAACNATGGACAATTATAAATTGTTACAACACCAAATCAAGATAATCCAATTACTGA…
E863	Endophthalmitis	S. haemolyticus	89.54	411	CNACATTNGACNAACTAACTATGGNAATTCATCATGACNAACACCACAACACGTATGTTACCAATTAAATTCTGCAGTTGAAAGAACAGATCTTGAATCTAAATCAATNGAAGAAATTGTTGCTAATTTAGATAGTGTNCCTGANAATATTCAAACAGCTGTTCGTAATAATGGTGGCGGACACCTTAACCATTCATTGTTCTGGGAATTATTAACNCCTAATTCNGAAGAAAAAGGTNAAGTTGTNGATAAAATCAAAGAACAATGGGGNTCTTAANATGAATTCAANACAANATTCGCATGACAAGCTACNCNTCCTTTGGTTTCNNGTGGGCTTGGGTTANTGNNAACGATGGATCATTTNNAATTTGTTTACNACCCNNANCNAAAAAAACCCAT…
E872	Endophthalmitis	S. epidermidis	97.75	769	CCCANCATNNCGACNAACTAACTATGGANATTCATGCATGACAAACATCATAACACATATGTTACAAAATTAAATTCAGCAGTTGAAGAGGACAGATTTAGAAGCTAAATCAATCGAAGAAATTGTTGCTAATTTAGATAGTGTGCCATCTAATATTCAAACAGCTGTTCGTAATAATGGCGGTGGTCACCTTAACCATTCATTGTTCTGGGAACTATTATCACCAAATTCTGAAGAAAAAGGTGAAGTAGTAGATAAAATTAAAGAACAATGGGGTTCTTTAGATGAATTTAAAAAAGAATTTGCAGATAAAGCTGCAGCACGCTTTGGTTCAGGATGGGCTTGGTTAGTTGTAAACAATGGACAATTANAAATTGTTACAACACCAAATCAAGATAA…
E874	Endophthalmitis	S. epidermidis	97.54	761	ACCACATTCGACAACAAACTATGGAAATNCATCATGACAAACATCATAACACATATGTTACAAAATTAAATTNCAGCAGTTTGAAGGGACAGATTTAGAAGCTAAATCAATCGAAGAAATTNGTTGCTAATTTTAGATAGTGTGCCATCTAATATTCAAACAGCTGTTCGTAATAATGGCGGTGGACACCTTAACCATTCATTGTTCTGGGAACTATTATCACCAAATTCTGAAGAAAAAGGTGAAGTAGTAGATAAAATTAAAGAACAATGGGGTTCTTTAGATGAATTTAAAAAAGAATTTGCAGATAAAGCTGCAGCACGATTTGGTTCAGGATGGGCTTGGTTAGTTGTAAACAATGGACAATTAGAAATTGTTACAACACCAAATCAAGATAAT…
E877	Endophthalmitis	S. epidermidis	98.43	789	AACCANCATTCCGACNAACAAACTATGGAAATTCATCATGACAAACATCATAACACATATGTTACAAAATTAAATTCAGCAGTTGAAGGGACAGATTTAGAAGCTAAATCAATCGAAGAAATTGTTGCTAATTTAGATAGTGTGCCATCTAATATTCAAACAGCTGTTCGTAATAATGGCGGTGGTCACCTTAACCATTCATTGTTCTGGGAACTATTATCACCAAATTCTGAAGAAAAAGGTGAAGTAGTAGATAAAATTAAAGAACAATGGGGTTCTTTAGATGAATTTAAAAAAGAATTTGCAGATAAAGCTGCAGCACGCTTTGGTTCAGGATGGGCTTGGTTAGTTGTAAACAATGGACAATTANAAATTGTTACAACACCAAATCAAGATAAT…
E878	Endophthalmitis	S. epidermidis	98.19	771	AACCATNCGGACAACAAACTATGGAAATTCATCATGACAAACATCATAACACATATGTTACAAAATTAAATTCAGCAGTTGAAGGGACAGATTTAGAAGCTAAATCAATCGAAGAAATTGTTGCTAATTTAGATAGTGTGCCATCTAATATTCAAACAGCTGTTCGTAATAATGGCGGTGGACACCTTAACCATTCATTGTTCTGGGAACTATTATCACCAAATTCTGAAGAAAAAGGTGAAGTAGTAGATAAAATTAAAGAACAATGGGGTTCTTTAGATGAATTTAAAAAAGAATTTGCAGATAAAGCTGCANCACGCTTTGGTTCAGGATGGGCTTGGTTAGTTGTAAACGATGGACAATTATAAATTGTTACAACACCAAATCAAGATAATCCAA…
K2549	Keratitis	S. epidermidis	97.9	741	NNNNNNNNNNNNNNNNNNNACTANGGAAATTCATCATGACAAACATCATAACACATATGTTACAAAATTAAATTCAGCAGTTAGAAGGGACAGATTTAGAAGCTAAATCAATCGAAGAAATTCGTTCGCTAATTTAGATAGTGTGCCATCTAATATTCAAACAGCTGTTCGTAATAATGGCGGTGGTCACCTTAACCATTCATTGTTCTGGGAACTATTATCACCAAATTCTGAAGAAAAAGGTGAAGTAGTAGATAAAATTAAAGAACAATGGGGTTCTTTAGATGAATTTAAAAAAGAATTTGCAGATAAAGCTGCANCACGCTTTGGTTCAGGATGGGCTTGGTTAGTTGTAAACGATGGACAATTATAAATTGTTACAACACCAAATCAAGATAA…
K2551	Keratitis	S. epidermidis	97.14	771	CCACATCCGACNAACNAACTATGGAAATTCATCATGACAAACATCATAACACATATGTTACAAAATTAAATTCAGCAGTTGAAGGGACAGATTTAGAAGCTAAATCAATCGAAGAAATTNGTTCGCTAATTTAGATAGTGTGCCATCTAATATTCAAACAGCTGTTCGTAATAATGGCGGTGGNCACCTTAACCATTCATTGTTCTGGGAANTATTATCACCAAATTCTGAAGAAAAAGGTGAAGTAGTAGATAAAATTAAAGAACAATGGGGTTCTTTAGATGAATTTAAAAAAGAATTTGCAGATAAAGCTGCAGCACGCTTTGGTTCAGGATGGGCTTGGTTAGTTGTAAACAATGGACAATTATAAATTGTTACAACACCAAATCAAGATAATCC…
K2590	Keratitis	S. epidermidis	93.45	671	CANCNATNCGNNCNAACNAACTATNGGAAATTCTCTGACNACATCTGAACCNTNTGTTANNAATTAATTCNGCGGTTGAAGGGACAGATTTAGAAGCTAAATCAATCGAAGAAATTGTTGCTAATTTAGATAGTGTGCCATCTAATATTCAAACAGCTGTTCGTAATAATGGCGGTGGACACCTTAACCATTCATTGTTCTGGGAACTATTATCACCAAATTCNGAAGAAAAAGGTGAAGTAGTAGATAAAATTAAAGAACAATGGGGTTCTTTANATGAATTTAAAAAAGAATTTGCAGATAAAGCTGCNNCACGATTTGGTTCAGGATGGGCTTGGTTAGTTGTAAACGATGGACAATTATAAATTGTTACAACACCAAATCAAGATAATCCAATTA…
K2624	Keratitis	S. epidermidis	97.29	763	NNNNNNTCGACANACAAACTATGGAAATTCATCATGACNAACATCATAACACATATGTTACAAAATTAAATTCAGCAGTTGAAGGGACAGATTTAGAAGCTAAATCAATCGAAGAAATTGTTGCTAATTTAGATAGTGTGCCATCTAATATTCAAACAGCTGTTCGTAATAATGGCGGTGGTCACCTTAACCATTCATTGTTCNGGGAACTATTATCACCAAATTCNGAAGAAAAAGGTGAAGTAGTAGATAAAATTAAAGAACAATGGGGTTCTTTAGATGAATTTAAAAAAGAATTTGCAGATAAAGCTGCANCACGCTTTGGTTCAGGATGGGCTTGGTTAGTTGTAAACGATGGACAATTATAAATTGTTACAACACCAAATCAAGATAATCCAA…
K2663	Keratitis	S. epidermidis	98.86	778	CCAAGGATNCGACNAACAAACTATGGAAATTCATGCATGACAAACATCATAACACATATGTTACAAAATTAAATTCAGCAGTTGAAGAGGACAGATTTAGAAGCTAAATCAATCGAAGAAATTGTTGCTAATTTAGATAGTGTGCCATCTAATATTCAAACAGCTGTTCGTAATAATGGCGGTGGTCACCTTAACCATTCATTGTTCTGGGAACTATTATCACCAAATTCTGAAGAAAAAGGTGAAGTAGTAGATAAAATTAAAGAACAATGGGGTTCTTTAGATGAATTTAAAAAAGAATTTGCAGATAAAGCTGCAGCACGCTTTGGTTCAGGATGGGCTTGGTTAGTTGTAAACAATGGACAATTAGAAATTGTTACAACACCAAATCAAGATAAT…
K2671	Keratitis	S. epidermidis	97.35	767	CCAACATCGACAACNAACTATGGAAATTCATCATGACAAACATCATAACACATATGTTACAAAATTAAATTNCAGCAGTTNGAAGGGACAGATTTAGAAGCTAAATCAATCGAAGAAATTNGTTGCTAATTTAGATAGTGTGCCATCTAATATTCAAACAGCTGTTCGTAATAATGGCGGTGGTCACCTTAACCATTCATTGTTCTGGGAACTATTATCACCAAATTCTGAAGAAAAAGGTGAAGTAGTAGATAAAATTAAAGAACAATGGGGTTCTTTAGATGAATTTAAAAAAGAATTTGCAGATAAAGCTGCANCACGCTTTGGTTCAGGATGGGCTTGGTTAGTTGTAAACAATGGACAATTATAAATTGTTACAACACCAAATCAAGATAATCC…
K2699	Keratitis	S. epidermidis	98.86	776	NNNNNNTNCGACAACAAACTATGGAAATTCATCATGACAAACATCATAACACATATGTTACAAAATTAAATTNCAGCAGTTGAAGAGGACAGATTTAGAAGCTAAATCAATCGAAGAAATTGTTGCTAATTTAGATAGTGTGCCATCTAATATTCAAACAGCTGTTCGTAATAATGGCGGTGGTCACCTTAACCATTCATTGTTCTGGGAACTATTATCACCAAATTCTGAAGAAAAAGGTGAAGTAGTAGATAAAATTAAAGAACAATGGGGTTCTTTAGATGAATTTAAAAAAGAATTTGCAGATAAAGCTGCAGCACGCTTTGGTTCAGGATGGGCTTGGTTAGTTGTAAACAATGGACAATTAGAAATTGTTACAACACCAAATCAAGATAATCC…
K2705	Keratitis	S. epidermidis	97.09	470	CCCACATCGACNAACAAACTATGGAAATTCATCATGACAAACATCATAACACATATGTTACAAAATTAAATTCAGCAGTTGAAGGGACAGATTTAGAAGCTAAATCAATCGAAGAAATTGTTGCTAATTTAGATAGTGTGCCATCTAATATTCAAACAGCTGTTCGTAATAATGGCGGTGGTCACCTTAACCATTCATTGTTCTGGGAACTATTATCACCAAATTCAGAANAAAAAGGTGAAGTAGTAAATAAAATTNTAAAACAAAGGGGTTCTTTNAATANNANTAGGAAANACNCTTTACATACANCANCNGCTTCNCGCTTGGTNTTAANGTNGGAANTTGGTTCCTTCNACACGGNNGNANTTATTNTTNANNTNNTACGGGTTNAAANCGTTT…
K2708	Keratitis	S. epidermidis	95.27	723	ANCACATNCGACNAACAAACTATGGAAATTTCATCATGACAAACATCATAACACATATGTTACAAAATTAAATTNCAGCAGTNTGAAGGGACAGATTTAGAAGCTAAATCAATCGAAGAAATTGTTGCTAATTTAGATAGTGTGCCATCTAATATTCAAACAGCTGTTCGTAATAATGGCGGTGGTCACCTTAACCATTCATTGTTCTGGGAACTATTATCACCAAATTCTGAAGAAAAAGGTGAAGTAGTANATAAAATTAAAGAACAATGGGGTTCTTTAGATGAATTTAAAAAAGAATTTGCANATAAAGCTGCNNCACNCTTTGGTTCAGGATGGGCTTGGTTANTTGTAAACNATGNACAATTATAAATTGTTACAACACCAAANCNNTATAAT…
K2714	Keratitis	S. epidermidis	95.6	725	NCACATTNCGACAACAAACTATGGAAATTCTTCATGACAAACNTCTAACACTATGTNAAAATAAATTCAGCAGTTGAAGGGAAGATTTAGAACTAAATCAATCGAAGAAATCGTCGCTAATTTAGATAGTGTGCCATCTAATATTCAAACAGCTGTTCGTAATAATGGCGGTGGTCACCTTAACCATTCATTGTTCTGGGAACTATTATCACCAAATTCTGAAGAAAAAGGTGAAGTAGTAGATAAAATTAAAGAACAATGGGGTTCTTTAGATGAATTTAAAAAAGAATTTGCAGATAAAGCTGCAGCACGCTTTGGTTCAGGATGGGCTTGGTTAGTTGTAAACAATGGACAATTAGAAATNGTTACAACACCAAATCAAGATAATCCAATTACTGA…
K2715	Keratitis	S. epidermidis	96.7	756	ACCACATTCCGACAACAAACTATGGAAATTCTCATGACNAACATCATAACACATATGTTNACAAAATTAAATTCAGCAGTTTGAAGGGACAGATTTAGAAGCTAAATCAATCGAAGAAATTTGTTGCTAATTTAGATAGTGTGCCATCTAATATTCAAACAGCTGTTCGTAATAATGGCGGTGGTCACCTTAACCATTCATTGTTCTGGGAACTATTATCACCAAATTCTGAAGAAAAAGGTGAAGTAGTAGATAAAATTAAAGAACAATGGGGTTCTTTAGATGAATTTAAAAAAGAATTTGCAGATAAAGCTGCANCACGCTTTGGTTCAGGATGGGCTTGGTTAGTTGTAAACAATGGACAATTATAAATTGTTACAACACCAAATCAAGATAATC…
K2724	Keratitis	S. epidermidis	91.42	638	CCANCATCCGACAAACAAACTATGGAAATTCATCATGACAAACATCATAACACATATGTTACAAAATTAAATTCAGCAGTTGAAGGGACAGATTTAGAAGCTAAATCAATCGAAGAAATTGTTGCTAATTTAGATAGTGTGCCATCTAATATTCAAACAGCTGTTCGTAATAATGGCGGTGGTCACCTTAACCATTCATTGTTCNGGGAACTATTATCACCAAATTCNGAAGAAAAAGGTGAAGTAGTANATAAAATTAAAGAACAATGGGGTTCTTTAGATGAATTTGNAAAAGAATTTGCANATAAAGCTGCTTCACGCTTTGGTTCAGGATGGGCTTGGTTANTTGNAANCGNTGAACAATTATAANTTGNNACAGCGCCANNACGTNAGAATCGA…
K2725	Keratitis	S. epidermidis	96.94	763	AACCACCATTCCGACAACAAACTATGGAAATTCATCATGACAAACATNCATAACACATATGTTACAAAATTAAATTNCAGCAGTTNGAAGGGACAGATTTAGAAGCTAAATCAATCGAAGAAATTNGTTGCTAATTTAGATAGTGTGCCATCTAATATTCAAACAGCTGTTCGTAATAATGGCGGTGGTCACCTTAACCATTCATTGTTCTGGGAACTATTATCACCAAATTCTGAAGAAAAAGGTGAAGTAGTAGATAAAATTAAAGAACAATGGGGTTCTTTAGATGAATTTAAAAAAGAATTTGCAGATAAAGCTGCAGCACGCTTTGGTTCAGGATGGGCTTGGTTAGTTGTAAACNATGGACAATTATAAATTGTTACAACACCAAATCAAGAT…
K2737	Keratitis	S.caprae	98.62	776	ACCNACATNNCNGATNANACAAACTATGGAGATTCATCACGACNAACACCATAACACATATGTAACTAAATTAAACTCAGCAGTTGAAGGAACAGATTTAGAAGCTAAATCAATCGAAGAAATTGTTGCAAATTTAAATAGCGTACCTTCTGATATTCAAACAGCAGTACGTAACAATGGTGGCGGTCACTTAAACCACTCATTATTCTGGGAATTATTATCACCTAATTCTGAAGAAAAAGGTGAAGTTGTAGACAAAATCAAAGAACAATGGGGCTCTTTAGATGAATTCAAAAAAGAATTCGCTGACAAAGCAGCAGCTCGTTTCGGTTCAGGTTGGGCTTGGTTAGTAGTAAACAACGGTCAATTATAAATCGTAACTACACCAAACCAANATAA…
K2743	Keratitis	S. epidermidis	95.42	671	CCNAGCTCCGATTACCTAATTCATGGNANATTCTGCTTNGACAAACATCTNNACACTTTGTTACACATTAAATTCATCNNTTGAANAGGACAGATTTAGAAGCTAAATCAATCGAAGAAATTGTTGCTAATTTAGATAGTGTGCCATCTAATATTCAAACAGCTGTTCGTAATAATGGCGGTGGTCACCTTAACCATTCATTGTTCTGGGAACTATTATCACCAAATTCTGAAGAAAAAGGTGAAGTAGTAGATAAAATTAAAGAACAATGGGGTTCTTTAGATGAATTTAAAAAAGAATTTGCAGATAAAGCTGCAGCACGCTTTGGTTCAGGATGGGCTTGGTTAGTTGTAAACNATGGACAATTATAAATTGTTACAACACCAAATCAANATAATC…
K2748	Keratitis	S. epidermidis	97.72	608	AGANTTCGACAAACNAACTCATGGAAATTCATGCATGACAAAACATCATAACACATATGTTACAAAATTAAATTCAGCAGTTGAAGGGGACAGATTTAGAAGCTAAATCAATCGAAGAAATTGTTGCTAATTTAGATAGTGTGCCATCTAATATTCAAACAGCTGTTCGTAATAATGGCGGTGGTCACCTTAACCATTCATTGTTCTGGGAACTATTATCACCAAATTCTGAAGAAAAAGGTGAAGTAGTAGATAAAATTAAAGAACAATGGGGTTCTTTAGATGAATTTAAAAAAGAATTTGCAGATAAAGCTGCNNCACGCTTTGGTTCAGGATGGGCTTGGTTAGTTGNAAACGNTGAANTATTATAAGTTGNTACTGCGTCANNACGTTAGANTC…
K2755	Keratitis	S. epidermidis	94.32	708	NCCACATTCCGACNAACAAACCNATNGGAAATNCATCATGACAAACACCAAACACAANGTACAAAATAAATNCAGCAGTNGAAGGGAAGATTTAGAAGCTAAATCAATCGAAGAAATCGTCGCTAATTNAGATAGTNGNGCCATCTAATATTCAAACAGCTGTTCGTAATAATGGCGGTGGTCACCTTAACCATTCATTGTTCTGGGAACTATTATCACCAAATTCTGAAGAAAAAGGTGAAGTAGTAGATAAAATTAAAGAACAATGGGGTTCTTTAGATGAATTTAAAAAAGAATTTGCAGATAAAGCTGCAGCACGCTTTGGTTCAGGATGGGCTTGGTTAGTTGTAAACAATGGACAATTAGAAATTGTTACAACACCAAATCAAGATAATCCAA…
K2761	Keratitis	S. epidermidis	96.18	566	NCACATNCGACAACNAACTATGGAAATTCATCATGACAAACATCATAACACATATGTTACAAAATTAAATTCAGCAGTTGAAGGGACAGATTTAGAAGCTAAATCAATCGAAGAAATTGTTGCTAATTTAGATAGTGTGCCATCTAATATTCAAACAGCTGTTCGTAATAATGGCGGTGGTCACCTTAACCATTCATTGTTCTGGGAACTATTATCACCAAATTCNGAANAAAAAGGTGAAGTAGTANATAAAATTAAAGAACAATGGGGTTCTTTANATGAATTTNAAAAACAATTTGCATATAAAGCTGCTTCACCCTTTGGTTCAGGATGGGCTTGGGTCCCTTCAACTGNTGAATTNAATTNNGTNNCANATGTGTTATGANGTTAGNCNCGATN…
K2770	Keratitis	S. lugdunensis	85.13	473	ANCAACAAACNGAAAACGGAANCAACGGAAAACCACCACGAAAACACCAAACACGACGCGACAAAAAANTNCTGCAGTTGANGTACAGACTTAGAGTCTAAATCTATNGAGNAATTTNTTGCCAATTTAAATANCGTTCCTGAAAACATTCAAACANCTNTACGTAATAATGGTGNCGGACACTTAACCCATTCACTATTCTGGGAATTTTNAACTCCTAATTCTGAAAAAAAGGTACNGTAGTTGATAAAATTAAAGAACAATGGGGTTCTTTANATGAATTCAAAAAAAANTTCNCTAACAAACCTGCACGTCCTTTTGTTTCAGGTTGGGNNTGGTTANTTGTAANTANGGNTAAATTAAAATTTGTTACANCCCCTAACCAAAACAACCCATTAN…
K2776	Keratitis	S. epidermidis	91.26	638	NNNNACNACATNCGACAAACTAACTATGGAAATTCATCATGACNAACATCATAACACATATGTTACAAAATTAAATTCAGCAGTTGAAGGGACAGATTTAGAAGCTAAATCAATCGAAGAAATTGTTGCTAATTTAGATAGTGTGCCATCTAATATTCAAACAGCTGTTCGTAATAATGGCGGTGGNCACCTTAACCATTCATTGTTCTGGGAACTATTATCACCAAATTCNGAANAAAAAGGTGAAGTAGTANATAAAATTAAAGAACAATGGGGTTCTTTAGATGAATTTAAAAAANAATTTGCATATAAAGCTGCNNCACNCTTTGGTTCAGGATGGGCTTGGTTANNTGNAANCGATGAACTATTATAAGTTGCTACTGCGCCATAACGTTAGAA…
K2788	Keratitis	S. epidermidis	97.12	767	NACCACATTCCGACAAACAAACTATGGAAATTCATCATGACAAACATCATAACACATATGTTACAAAATTAAATTCAGCAGTTGAAGGGACAGATTTAGAAGCTAAATCAATCGAAGAAATTGTTGCTAATTTAGATAGTGTGCCATCTAATATTCAAACAGCTGTTCGTAATAATGGCGGTGGACACCTTAACCATTCATTGTTCTGGGAACTATTATCACCAAATTCTGAAGAAAAAGGTGAAGTAGTAGATAAAATTAAAGAACAATGGGGTTCTTTAGATGAATTTAGAAAAGAATTTGCAGATAAAGCTGCAGCACGATTTGGTTCAGGATGGGCTTGGTTAGTTGTAAACGATGGACAATTANAAATTGTTACAACACCAAATCNNGATAATC…
K2795	Keratitis	S. epidermidis	95.76	730	NNCAACCTTCCGACNACCNAACNATGGAAATTCATCATGACAAACATCATAACACATATGTTACAAAATTAAATTCACAGTTGAAGAGGACAGATTTAAAGCTAAATCAATCGAAAAATTGTTGCTAATTTAATAGTGTGCCATCTAATATTCAAACAGCTGTTCGTAATAATGGCGGTGGTCACCTTAACCATTCATTGTTCTGGGAACTATTATCACCAAATTCTGAAGAAAAAGGTGAAGTAGTAGATAAAATTAAAGAACAATGGGGTTCTTTAGATGAATTTAAAAAAGAATTTGCANATAAAGCTGCANCACGCTTTGGTTCAGGATGGGCTTGGTTANTTGTAAACAATGGACAATTATAAATTGTTACAACACCAAATCAANATAATCCAA…
K2798	Keratitis	S. epidermidis	94.24	704	ACNACATCNGACAACNAACTATGGAAATTCATCATGACAAACATCATAACACATATGTTACAAAATTAAATTNCAGCAGTTTGAAGGGACAGATTTAGAAGCTAAATCAATCGAAGAAATTNGTTNGCTAATTTAGATAGTGTGCCATCTAATATTCAAACAGCTGTTCGTAATAATGGCGGTGGTCACCTTAACCATTCATTGTTCTGGGAATTATTATCACCAAATTCTGAANAAAAAGGTGAAGTAGTANATAAAATTAAAGAACAATGGGGTTCTTTANATGAATTTAAAAAANAATTTGCATATAAAGCTGCATCACGCTTTGGTTCAGGATGGGCTTGGTTANTTGTAAACNATGNACAATTATAAATTGTTACAACACCAAATCNTTATAAT…
K2801	Keratitis	S. epidermidis	97.75	691	NCCANNNTNCCGACGAANGNAANTGTGGNNATTTCTGCNTGACAAACATNTGAANTCTTTGTTAANAATTAAATTCTGCAGTTGAAGAGGACAGATTTAGAAGCTAAATCAATCGAAGAAATTGTTGCTAATTTAGATAGTGTGCCATCTAATATTCAAACAGCTGTTCGTAATAATGGCGGTGGTCACCTTAACCATTCATTGTTCTGGGAACTATTATCACCAAATTCTGAAGAAAAAGGTGAAGTAGTAGATAAAATTAAAGAACAATGGGGTTCTTTAGATGAATTTAAAAAAGAATTTGCAGATAAAGCTGCAGCACGCTTTGGTTCAGGATGGGCTTGGTTAGTTGTAAACAATGGACAATTAGAAATTGTTACAACACCAAATCAAGATAAT…
K2820	Keratitis	S. epidermidis	97.2	494	ACACATCGACAAACAAACTATGGAAATTCATCATGACAAACATCATAACACATATGTTACAAAATTAAATTCAGCAGTTGAAGGGACAGATTTAGAAGCTAAATCAATCGAAGAAATTGTTGCTAATTTAGATAGTGTGCCATCTAATATTCAAACAGCTGTTCGTAATAATGGCGGTGGTCACCTTAACCATTCATTGTTCAGGGAACTANTATCACCNAATTCAGAANAAAAAGGTGAAGTAGTACATAAAATTAAANAACAATGGGGTTCTTTANATGAATTTGGAACACAATNTGAATANANANCTGTTCCTCCCATTGNTTTAGNTTGGGCATCTGTCCCTTCNAATGATGAANTTAATTNANCNAATCTGCNNATGATGNCGTNTCNCNATAA…
K2830	Keratitis	S. pettenkoferi	98.36	752	NGNATACTTNANTATTCCGATTAAAGAAACAATGACTATCCATCATGACAAACACCACAACACTTATGTTACTAAATTAAATTCAGCTATCGAAGGTACTGATTTAGAATCTAAATCAATCGAAGAAATCGTAGCTAACCTTGACAGCGTACCAAGCGATATTCAAACTGCAGTACGTAACAATGGTGGTGGACACTTAAACCACTCATTATTCTGGGAAATGATGACTCCTAATTCTAAAGAAGAAGGTACTGTAATTGATGAAATCAAAAAACAATGGGGCTCATTAGACAAATTTAAAGAAGAATTTGCTGATGCAGCTGCTGGACGTTTCGGTTCAGGCTGGGCTTGGTTAGTANTTAATAACGGTAAATTATAAATCACTTCTACTCCAAACCA…
K2838	Keratitis	S. capitis	96.98	776	AACCACCATNNTGATAAACAAACNNATGGAAATTCACCACGACAAACACCATAACACATATGTAACTAAATTAAACTCAGCAGTTTGAAGGAACAGATTTAGAAGCTAAATCAATCGAAGAAATTCGTTNGCTAATTTAGATAGCGTACCTTCAGATATTCAAACTNGCAGTACGTAATAATGGTGGCGGTCACTTAAACCACTCATTATTCTGGGAATTATTATCACCAAATTCTGAAGAAAAAGGTGAAGTAGTAGACAAAATTAAAGAACAATGGGGTTCTTTAGATGAATTCAAAAAAGAATTTGCAGATAAAGCTGCTGCACGCTTTGGATCTGGTTGGGCATGGTTAGTAGTAAATAACGGTCAATTAGAAATCGTTACTACTCCAAACCAAG…
K2861	Keratitis	S. epidermidis	97.54	774	NNNNNNCACATCGACNAACAAACTATGGAAATTCATCATGACAAACATCATAACACATATGTTACAAAATTAAATTCAGCAGTTGAAGAGGACAGATTTAGAAGCTAAATCAATCGAAGAAATTGTTGCTAATTTAGATAGTGTGCCATCTAATATTCAAACAGCTGTTCGTAATAATGGCGGTGGACACCTTAACCATTCATTGTTCTGGGAACTATTATCACCAAATTCTGAAGAAAAAGGTGAAGTAGTANATAAAATTAAAGAACAATGGGGTTCTTTANATGAATTTAAAAAAGAATTTGCAGATAAAGCTGCANCACGATTTGGTTCAGGATGGGCTTGGTTAGTTGTAAACAATGGACAATTATAAATTGTTACAACACCAAATCAAGATAA…
K2888	Keratitis	S. aureus	97.7	752	NACCNAGNTGTGATGAAATGAACNATGGAGTTTCATCACGACAAACATCACAATACGTACGTGACGAAATANAACGCTNCAGTTGAAAGAACAGAGTTAGAGCATCAATCACTAGCGGATATGATTGCTAACTTAGACAAGGTACCGGAAGCGATGAGGATGTCAGTCCGTAATAATGGCGGTGGTCATTTTAACCATTCATTATTCTGGGAAATACTATCACCTAATTCTGAAGAAAAAGGTGGCGTAATAGATGACATCAAAGCGCAGTGGGGCACTTTAGATGAATTTAAAAATGAATTTGCAAATAAAGCAACAACATTATTTGGATCAGGTTGGACTTGGTTAGTTGTTAATGATGGAAAATTAGAAATTGTGACAACGCCAAACCAAGATAAT…
K2894	Keratitis	S. epidermidis	98.19	778	NNAACNANCATTCCGACNAACAAACTATGGAAATTNCATCATGACAAACATCATAACACATATGTTACAAAATTAAATTCAGCAGTTGAAGGGACAGATTTAGAAGCTAAATCAATCGAAGAAATTGTTGCTAATTTAGATAGTGTGCCATCTAATATTCAAACAGCTGTTCGTAATAATGGCGGTGGACACCTTAACCATTCATTGTTCTGGGAACTATTATCACCAAATTCTGAAGAAAAAGGTGAAGTAGTAGATAAAATTAAAGAACAATGGGGTTCTTTAGATGAATTTAAAAAAGAATTTGCAGATAAAGCTGCAGCACGCTTTGGTTCAGGATGGGCTTGGTTAGTTGTAAACNATGGACAATTATAAATTGTTACAACACCAAATCAAGAT…
K2907	Keratitis	S. epidermidis	95.66	717	NNAGNAAGANGNGANCAACAAACCATGGAAANGAATNATGACAAACANCATAACACAGATGTTACAAAANAAATTCAGCAGNNGAAGAGGACAGATTTAGAAGCTAAATCAATCGAAGAAATTGTTGCTAATTTAGATAGTGTGCCATCTAATATTCAAACAGCTGTTCGTAATAATGGCGGTGGTCACCTTAACCATTCATTGTTCTGGGAACTATTATCACCAAATTCTGAAGAAAAAGGTGAAGTAGTAGATAAAATTAAAGAACAATGGGGTTCTTTAGATGAATTTAAAAAAGAATTTGCAGATAAAGCTGCAGCACGCTTTGGTTCAGGATGGGCTTGGTTAGTTGTAAACNATGGACAATTATAAATTGTTACAACACCAAATCAAGATAAT…
K2911	Keratitis	S. epidermidis	98.18	767	NAACCANCATTCCGANCAACAAACNATGGAAATTCATCATGACAAACATCATAACACATATGTTACAAAATTAAATTNCAGCAGTTGAAGGGACAGATTTAGAAGCTAAATCAATCGAAGAAATTNGTTGCTAATTTAGATAGTGTGCCATCTAATATTCAAACAGCTGTTCGTAATAATGGCGGTGGTCACCTTAACCATTCATTGTTCTGGGAACTATTATCACCAAATTCTGAAGAAAAAGGTGAAGTAGTAGATAAAATTAAAGAACAATGGGGTTCTTTAGATGAATTTAAAAAAGAATTTGCAGATAAAGCTGCAGCACGCTTTGGTTCAGGATGGGCTTGGTTAGTTGTAAACAATGGACAATTATAAATTGTTACAACACCAAATCAAGAT…
K2912	Keratitis	S. warneri	96.84	750	NNNNACACCANCCGANAAAGAAANCATGGAGATCACCATGATAAACACCACAACACTTATGTAACAAAATTAAACGCAGCAGTAGAAGGTACTGACTTAGAAGCTAAATCAATTNGAAGAAATTGTAGCTAACTTAGATAGTGTACCTTCAGATATTCAAACTGCAGTTAGAAATAACGGTGGCGGTCACTTAAACCACTCATTATTCTGGGAATTATTAACACCTAATTCAGAAGAAAAAGGTGAAGTAGTANATAAAATTAAAGAACAATGGGGTTCTTTAGATGAATTCAAAAAAGAATTCGCTGACAAAGCTGCAGCTCGCTTTGGCTCAGGTTGGGCTTGGTTAGTTGTTAATAATGGTCAATTATAAATCGTTACAACTCCNAACCAANATAA…
K2913	Keratitis	S. epidermidis	98.03	793	ACCACCATTCCGACAACAAACTATGGAAATTCATCATGACAAACATCATAACACATATGTTACAAAATTAAATTCAGCAGTTGAAGGGACAGATTTAGAAGCTAAATCAATCGAAGAAATTGTTGCTAATTTAGATAGTGTGCCATCTAATATTCAAACAGCTGTTCGTAATAATGGCGGTGGTCACCTTAACCATTCATTGTTCTGGGAACTATTATCACCAAATTCTGAAGAAAAAGGTGAAGTAGTAGATAAAATTAAAGAACAATGGGGTTCTTTAGATGAATTTAAAAAAGAATTTGCAGATAAAGCTGCAGCACGCTTTGGTTCAGGATGGGCTTGGTTAGTTGTAAACAATGGACAATTAGAAATTGTTACAACACCAAATCAAGATAATCC…
K2919	Keratitis	S. epidermidis	96.8	737	AAGANAGANACCGAAGAAAGAAACNANGGAAAACAGCATGACAAACANCATAACACATANGTTACAAAANAAATTCAGCAGTTGAAGGGACAGATTTAGAAGCTAAATCAATCGAAGAAATTGTTGCTAATTTAGATAGTGTGCCATCTAATATTCAAACAGCTGTTCGTAATAATGGCGGTGGTCACCTTAACCATTCATTGTTCTGGGAATTATTATCACCAAATTCTGAAGAAAAAGGTGAAGTAGTAGATAAAATTAAAGAACAATGGGGTTCTTTAGATGAATTTAAAAAAGAATTTGCAGATAAAGCTGCAGCACGCTTTGGTTCAGGATGGGCTTGGTTAGTTGTAAACAATGGACAATTAGAAATTGTTACAACACCAAATCAAGATAATC…
K2929	Keratitis	S. epidermidis	94.87	715	CCACATCCGACAACAAACTATGGANATTCATCATGACNAACATCATAACACATATGTTACTAAATTAAATTCAGCAGTTGAAGGAACAGATTTAGAAGCTAAATCAATCGAAGAAATTGTTGCTAATTTANATAGTGTGCCTTCTNATATTCAAACAGCTGTTCGTAATAATGGNGGTGGTCACCTTAACCATTCATTGTTCTGGGAACTATTATCACCTAATTCTGAAGAAAAAGGTGAAGTNGTAGANAAAATTAAAGAACAATGGGGTTCTTTAGATGAATTTAAAAAAGAATTTGCAGATAAAGCNGCAGCTCGCTTTGGTTCAGGATGGGCTTGGTTAGTTGTAAACAATGGACAATTATAAATTGTAACTACACCAAATCAAGATAANCCAAT…
K2930	Keratitis	S. epidermidis	96.71	749	AACCACCATTCCGACNAACAAACTTATNGGAAATTCCATCATTNGACAAACATNCATAACACATATNGTTACAAAATTAAATTCAGCAGTTTGAAGNGGACAGATTTAGAAGCTAAATCAATCGAAGAAATTGTTGCTAATTTAGATAGTGTGCCATCTAATATTCAAACAGCTGTTCGTAATAATGGCGGTGGTCACCTTAACCATTCATTGTTCTGGGAACTATTATCACCAAATTCTGAAGAAAAAGGTGAAGTAGTAGATAAAATTAAAGAACAATGGGGTTCTTTAGATGAATTTAAAAAAGAATTTGCAGATAAAGCTGCAGCACGCTTTGGTTCAGGATGGGCTTGGTTAGTTGTAAACAATGGACAATTAGAAATTGTTACAACACCAAAT…
K2941	Keratitis	S. epidermidis	97.44	739	NCCANCANNCCGANCAACAAACNANGGAAAACATCATGACAAACANCATAACACATANGTACAAAANAAATTCAGCAGTTGAAGGGACAGATTTAGAAGCTAAATCAATCGAAGAAATTGTTGCTAATTTAGATAGTGTGCCATCTAATATTCAAACAGCTGTTCGTAATAATGGCGGTGGTCACCTTAACCATTCATTGTTCTGGGAACTATTATCACCAAATTCTGAAGAAAAAGGTGAAGTAGTAGATAAAATTAAAGAACAATGGGGTTCTTTAGATGAATTTAAAAAAGAATTTGCAGATAAAGCTGCAGCACGCTTTGGTTCAGGATGGGCTTGGTTAGTTGTAAACAATGGACAATTAGAAATTGTTACAACACCAAATCAAGATAATCCAA…
K2964	Keratitis	S. epidermidis	94.81	710	NCCCAACCTTCCGACNAACNAACTATGGAAATTCATGCATGACAAACATCTAACACTNTGTTACCAAATTAAATTCNNCAGTTGAANAGGACAGATTTAGAAGCTAAATCAATCGAAGAAATTGTTGCTAATTTAGATAGTGTGCCATCTAATATTCAAACAGCTGTTCGTAATAATGGCGGTGGTCACCTTAACCATTCATTGTTCTGGGAACTATTATCACCAAATTCTGAAGAAAAAGGTGAAGTAGTAGATAAAATTAAAGAACAATGGGGTTCTTTAGATGAATTTAAAAAAGAATTTGCAGATAAAGCTGCAGCACGCTTTGGTTCAGGATGGGCTTGGTTAGTTGTAAACNATGGACAATTATAAATTGTTACAACNCCAAATCNNNANAAT…
K2978	Keratitis	S. capitis	99.18	656	CCCAAGGNNGNCGAAANAATTNAANCATGGNANANGANGNTGGGCAACACGCTANTACANGTANNGANNTCANAATNNTCATCATGTGCATAGAACAGATTTAGAAGCTAAATCAATCGAAGAAATTGTTGCTAATTTAGATAGCGTACCTTCAGATATTCAAACTGCAGTACGTAATAATGGTGGCGGTCACTTAAACCACTCATTATTCTGGGAATTATTATCACCAAATTCTGAAGAAAAAGGTGAAGTAGTAGACAAAATTAAAGAACAATGGGGTTCTTTAGATGAATTCAAAAAAGAATTTGCAGATAAAGCTGCTGCACGCTTTGGATCTGGTTGGGCATGGTTAGTAGTAAATAACGGTCAATTAGAAATCGTTACTACTCCAAACCAAGA…
K2994	Keratitis	S. epidermidis	98.01	782	NCCACAATNCGACAACNAACTATGGAAATTCATCATGACAAACATCATAACACATATGTTACAAAATTAAATTCAGCAGTTGAAGNGGACAGATTTAGAAGCTAAATCAATCGAAGAAATTGTTGCTAATTTAGATAGTGTGCCATCTAATATTCAAACAGCTGTTCGTAATAATGGCGGTGGTCACCTTAACCATTCATTGTTCTGGGAACTATTATCACCAAATTCTGAAGAAAAAGGTGAAGTAGTAGATAAAATTAAAGAACAATGGGGTTCTTTAGATGAATTTAAAAAAGAATTTGCAGATAAAGCTGCAGCACGCTTTGGTTCAGGATGGGCTTGGTTAGTTGTAAACAATGGACAATTAGAAATTGTTACAACACCAAATCAAGATAATCC…
K2997	Keratitis	S. epidermidis	96.27	745	AACAACANNCCGACCAAACAAACCNATNGGAAATNCATNCATGACAAACATNCATAACACATATGTTACAAAATTAAATTNCAGCAGTTTGAAGGGACAGATTTAGAAGCTAAATCAATCGAAGAAATTNGTTNGCTAATTTAGATAGTGTGCCATCTAATATTCAAACAGCTGTTCGTAATAATGGCGGTGGTCACCTTAACCATTCATTGTTCTGGGAACTATTATCACCAAATTCTGAAGAAAAAGGTGAAGTAGTAGATAAAATTAAAGAACAATGGGGTTCTTTAGATGAATTTAAAAAAGAATTTGCAGATAAAGCTGCAGCACGCTTTGGTTCAGGATGGGCTTGGTTAGTTGTAAACAATGGACAATTANAAATTGTTACAACACCAAATC…
K2998	Keratitis	S. epidermidis	95.76	726	ACCACCATNNCCGACCAACAAACCNNTGGAAATNCTCATGACAAACANCATAACACATATGTACAAAATAAATCCAGCAGTNGAAGGGACAGATTAGAAGCTAAATCAATCGAAGAAATNGTTGCTAATTTAGATAGTGTGCCATCTAATATTCAAACAGCTGTTCGTAATAATGGCGGTGGACACCTTAACCATTCATTGTTCTGGGAACTATTATCACCAAATTCTGAAGAAAAAGGTGAAGTAGTAGATAAAATTAAAGAACAATGGGGTTCTTTAGATGAATTTAAAAAAGAATTTGCAGATAAAGCTGCAGCACGATTTGGTTCAGGATGGGCTTGGTTAGTTGTAAACAATGGACAATTAGAAATTGTTACAACACCAAATCAAGATAATCCA…
K3001	Keratitis	S. epidermidis	98.42	780	ANCCACATTCCGACAACNAACTATGGAAATTCATCATGACAAACACCATAACACATATGTTACAAAATTAAATTCAGCAGTTGAAGAGGACAGATTTAGAAGCTAAATCAATCGAAGAAATTGTTGCTAATTTAGATAGTGTGCCATCTAATATTCAAACAGCTGTTCGTAATAATGGCGGTGGACACCTTAACCATTCATTGTTCTGGGAACTATTATCACCAAATTCTGAAGAAAAAGGTGAAGTTGTAGATAAAATAAAAGAACAATGGGGTTCTTTAGACGAATTTAAAAAAGAATTTGCAGATAAAGCTGCAGCACGCTTTGGTTCAGGATGGGCTTGGTTAGTTGTAAACAATGGACAATTAGAAATTGTTACAACACCAAATCAAGATAATC…
K3018	Keratitis	S. epidermidis	94.77	691	AAAANAGANNCCGAACAAACAAACNACGGAAAACAGCATGAAAACANCAAACACANACGTACAAAAAAAATNAGCAGTNGAAGGGACAGATTAGAAGCTAAATCAATCGAAGAAATNGTTGCTAATTTAGATAGTGTGCCATCTAATATTCAAACAGCTGTTCGTAATAATGGCGGTGGTCACCTTAACCATTCATTGTTCTGGGAACTATTATCACCAAATTCTGAAGAAAAAGGTGAAGTAGTAGATAAAATTAAAGAACAATGGGGTTCTTTAGATGAATTTAAAAAAGAATTTGCAGATAAAGCTGCAGCACGCTTTGGTTCAGGATGGGCTTGGTTAGTTGTAAACAATGGACAATTATAAATTGTTACAACACCAAATCAAGATAATCCAATT…
K3034	Keratitis	S. epidermidis	97.77	774	CCACATCGACAACAAACTATGGAAATTCTCATGACAAACATCATAACACATATGTTACNAAATTAAATTTCAGCAGTTGAAGGGACAGATTTAGAAGCTAAATCAATCGAAGAAATTNGTTGCTAATTTAGATAGTGTGCCATCTAATATTCAAACAGCTGTTCGTAATAATGGCGGTGGTCACCTTAACCATTCATTGTTCTGGGAACTATTATCACCAAATTCTGAAGAAAAAGGTGAAGTAGTAGATAAAATTAAAGAACAATGGGGTTCTTTAGATGAATTTAAAAAAGAATTTGCAGATAAAGCTGCAGCACGCTTTGGTTCAGGATGGGCTTGGTTAGTTGTAAACAATGGACAATTANAAATTGTTACAACACCAAATCAAGATAATCCAAT…
K3044	Keratitis	S. epidermidis	98.36	645	CCCNAGNCTNNCGAATTCTTAATCATGGTCATGACGTTNGGGAACACGCTATTACATGTACCGAGCTCGAATTCTTAATCATGGTCATAGGACAGATTTAGAAGCTAAATCAATCGAAGAAATTGTTGCTAATTTAGATAGTGTGCCATCTAATATTCAAACAGCTGTTCGTAATAATGGCGGTGGACACCTTAACCATTCATTGTTCTGGGAACTATTATCACCAAATTCTGAAGAAAAAGGTGAAGTTGTAGATAAAATNAAAGAACAATGGGGTTCTTTAGANGAATTTAAAAAAGAATTTGCAGATAAAGCTGCAGCACGCTTTGGTTCAGGATGGGCTTGGTTAGTTGTAAACAATGGACAATTAGAAATTGTTACAACACCAAATCAAGATAA…
K3076	Keratitis	S. epidermidis	96.92	763	NCACATNCGACAACNAACTATGGNAATTCTCTGACAACATCNTAACACATATGTTACNAAATTAAATTCAGCAGTTGAAGGGACAGATTTAGAAGCTAAATCAATCGAAGAAATTGTTGCTAATTTAGATAGTGTGCCATCTAATATTCAAACAGCTGTTCGTAATAATGGCGGTGGTCACCTTAACCATTCATTGTTCTGGGAACTATTATCACCAAATTCTGAAGAAAAAGGTGAAGTAGTAGATAAAATTAAAGAACAATGGGGTTCTTTAGATGAATTTAAAAAAGAATTTGCAGATAAAGCTGCAGCACGCTTTGGTTCAGGATGGGCTTGGTTAGTTGTAAACAATGGACAATTAGAAATTGTTACAACACCAAATCAAGATAATCCAATTAC…
K3098	Keratitis	S. epidermidis	98.03	787	NCAACATCGACAAACAAACTATGGAAATTCATCATGACAAACATCATAACACATATGTTACAAAATTAAATTCAGCAGTTTGAAGGGACAGATTTAGAAGCTAAATCAATCGAAGAAATTNGTTNGCTAATTTAGATAGTGTGCCATCTAATATTCAAACAGCTNGTTCGTAATAATGGCGGTGGTCACCTTAACCATTCATTGTTCTGGGAACTATTATCACCAAATTCTGAAGAAAAAGGTGAAGTAGTAGATAAAATTAAAGAACAATGGGGTTCTTTAGATGAATTTAAAAAAGAATTTGCAGATAAAGCTGCAGCACGCTTTGGTTCAGGATGGGCTTGGTTAGTTGTAAACAATGGACAATTAGAAATTGTTACAACACCAAATCAAGATAAT…
K3103	Keratitis	S. epidermidis	99.32	797	NCACATCGACNAACAAACTATGGAAATTCATCATGACAAACATCATAACACATATGTTACAAAATTAAATTCAGCAGTTGAAGGGACAGATTTAGAAGCTAAATCAATCGAAGAAATTGTTGCTAATTTAGATAGTGTGCCATCTAATATTCAAACAGCTGTTCGTAATAATGGCGGTGGTCACCTTAACCATTCATTGTTCTGGGAACTATTATCACCAAATTCTGAAGAAAAAGGTGAAGTAGTAGATAAAATTAAAGAACAATGGGGTTCTTTAGATGAATTTAAAAAAGAATTTGCAGATAAAGCTGCAGCACGCTTTGGTTCAGGATGGGCTTGGTTAGTTGTAAACAATGGACAATTAGAAATTGTTACAACACCAAATCAAGATAATCCAAT…
Key
a - Percent ID was assigned by the NCBI BLAST program to indicate the percent ID Match that the sequence has to the referenced database sequence.
b - Max Score is assigned by the NCBI BLAST program to score best matching sequences to the database sequences.
